# Supplementary material
Source: PubMed Central journal article supplement (PMC4271061)
Supplement: supp_ddu411_ddu411supp.pdf [file supp_ddu411_ddu411supp.pdf]

## **Acknowledgements and Funding**

### **ADIGEN (Adiposity and Genetics)**

The authors thank Arne Astrup, Eva Black and Birgit M Nielsen for their contribution to the study, and also the participants of the ADIGEN study for making it successful. The study was supported by The Danish Medical Research Council and the Danish Strategic Research Council.

### **ARIC (Atherosclerosis Risk in Communities study)**

The Atherosclerosis Risk in Communities Study is carried out as a collaborative study supported by National Heart, Lung, and Blood Institute contracts (HHSN268201100005C, HHSN268201100006C, HHSN268201100007C, HHSN268201100008C, HHSN268201100009C, HHSN268201100010C, HHSN268201100011C, and HHSN268201100012C), R01HL087641, R01HL59367 and R01HL086694; National Human Genome Research Institute contract U01HG004402; and National Institutes of Health contract HHSN268200625226C.

The authors thank the staff and participants of the ARIC study for their important contributions. Infrastructure was partly supported by Grant Number UL1RR025005, a component of the National Institutes of Health and NIH Roadmap for Medical Research.

### **CHS (Cardiovascular Health Study)**

The Cardiovascular Health Study (CHS) research reported in this article was supported by National Heart, Lung, and Blood Institute (NHLBI) contracts HHSN268201200036C, HHSN268200800007C, N01HC55222, N01HC85079, N01HC85080, N01HC85081, N01HC85082, N01HC85083, N01HC85086; and NHLBI grants R01HL085710, HL080295, HL087652, HL105756, HL103612, HL120393, HL085251 with additional contribution from the National Institute of Neurological Disorders and Stroke (NINDS). Additional support was provided through AG023629 from the National Institute on Aging (NIA). A full list of principal CHS investigators and institutions can be found at [CHS-NHLBI.org/](http://CHS-NHLBI.org/). The provision of genotyping data was supported in part by the National Center for Advancing Translational Sciences, CTSI grant UL1TR000124, and the National Institute of Diabetes and Digestive and Kidney Disease Diabetes Research Center (DRC) grant DK063491 to the Southern California Diabetes Endocrinology Research Center. The content is solely the responsibility of the authors and does not necessarily represent the official views of the National Institutes of Health. Infrastructure for the CHARGE Consortium is supported in part by the National Heart, Lung, and Blood Institute grant HL105756.

### **CLHNS (Cebu Longitudinal Health and Nutrition Survey)**

We thank Ying Wu, Amanda Marvelle, Linda Adair, and the Office of Population Studies Foundation research and data collection teams. This work was supported by National Institutes of Health grants DK078150, TW05596, HL085144, TW008288, RR20649, ES10126 and DK56350.

### **CoLaus (Cohorte Lausannoise)**

The CoLaus study was supported by research grants from GlaxoSmithKline and from the Faculty of Biology and Medicine of Lausanne, Switzerland. The study was and is currently funded by the Swiss National Science Foundation (grants no: 33CSCO-122661 and 33CSCO-139468). We

thank Zoltan Kutalik from the Swiss Institute of Bioinformatics, Lausanne, Switzerland, for providing data and genotyping information.

**DILGOM (FINRISK/DILGOM 2007 Study)**

The DILGOM project is supported by the Academy of Finland (grant numbers 136895 and 263836). KK was supported by the Orion-Farnos Research Foundation and Academy of Finland (grant number 250207). We are grateful for the THL DNA laboratory for its skillful work to produce the DNA samples used in this study.

**EPIC\_NL (European Prospective Investigation into Cancer and nutrition –Netherlands)**

The EPIC-NL study was funded by ‘Europe against Cancer’ Programme of the European Commission (SANCO); the Dutch Ministry of Public Health, Welfare and Sports (formerly Ministry of Welfare, Public Health and Culture); the Dutch Cancer Society; ZonMW the Netherlands Organisation for Health Research and Development; and World Cancer Research Fund (WCRF). Part of this work was funded by an IOP Genomics grant from Senter Novem (IGE05012).

**EPIC\_Norfolk (The European Prospective Investigation into Cancer and Nutrition - Norfolk Study)**

The EPIC-Norfolk Study is funded by program grants from the Medical Research Council UK and Cancer Research UK.

**FamHS (NHLBI Family Heart Study)**

The Family Heart Study (FamHS) work was supported in part by NIH grants 5R01 HL08770003, 5R01 HL08821502 (Michael A. Province) from NHLBI, and 5R01 DK07568102, 5R01 DK06833603 from NIDDK (Ingrid B. Borecki). The authors thank the staff and participants of the FHS for their important contributions.

**FDPS (The Finnish Diabetes Prevention Study)**

This study has been financially supported by grants from the Academy of Finland (117844 and 40758, 211497 and 118590 (MU); 38387 and 46558 (JT); 206310 and 73566 (SKK)), 128315 and 129330 (JL), Juho Vainio Foundation (JL), the Novo Nordisk Foundation (JL), The EVO-fund of Kuopio University Hospital (5106, 5168 and 5254 (MU)), The Ministry of Education of Finland, The Finnish Diabetes Research Foundation, Yrjö Jahnsson Foundation (56358 (MK)), Sigrid Juselius Foundation, The Graduate School of Molecular Medicine (NS), Nordic centre of Excellence (NCoE) on “Systems biology in controlled dietary interventions and cohort studies” (SYSDIET; project number 070014), TEKES 70103/06 and 40058/07 and INTERACT.

**Fenland (The Fenland Study)**

The Fenland Study is funded by the Wellcome Trust and the Medical Research Council. We are grateful to all the volunteers for their time and help, and to the General Practitioners and practice staff for help with recruitment. We thank the Fenland Study Investigators, the Study co-ordination team and the Epidemiology Field, Data and Laboratory teams.

**FHS (Framingham Heart Study)**

This research was conducted in part using data and resources from the Framingham Heart Study of the National Heart Lung and Blood Institute of the National Institutes of Health and Boston University School of Medicine. The analyses reflect intellectual input and resource development from the Framingham Heart Study investigators participating in the SNP Health Association Resource (SHARe) project. This work was partially supported by the National Heart, Lung and Blood Institute's Framingham Heart Study (Contract No. N01-HC-25195) and its contract with Affymetrix, Inc for genotyping services (Contract No. N02-HL-6-4278). A portion of this research utilized the Linux Cluster for Genetic Analysis (LinGA II) funded by the Robert Dawson Evans Endowment of the Department of Medicine at Boston University School of Medicine and Boston Medical Center.

### **GEMINAKAR (Genes and environment in insulin resistance, adiposity and cardiovascular risk factors)**

We thank Ann Louise Hasselbalch and Kirsten Ohm Kyvik for their contributions. The GEMINAKAR (Genes and environment in insulin resistance, adiposity and cardiovascular risk factors) project was supported by grants from the Danish Medical Research Council, the Danish Diabetes Association, the NOVO Foundation, the Danish Heart Foundation, Apotekerfonden, the Foundation of A. and J. Louis-Hansen, the Foundation of Direktor E. Danielsen and wife, the Foundation of Direktor K. Bonnelycke and wife Grethe, the Foundation of Laegevidenskabens Fremme, the Foundation of A. F. Bolding, the Foundation of O. William and E. B. Olesen, the Faculty of Health at University of Southern Denmark, the Danish National Science Foundation, T. Steenbeck's Foundation, the Gangsted Foundation and King Christian the Tenth's Foundation. K. O. Kyvik received funding from the European Union Contract No. QLG2-CT-2002-01254 (the GenomeUtwinn project). Finally, we would like to thank all twins participating in the GEMINAKAR Study

### **Generation R (The Generation R study)**

The Generation R Study is conducted by the Erasmus Medical Center in close collaboration with the School of Law and the Faculty of Social Sciences at the Erasmus University, Rotterdam, the Municipal Health Service, Rotterdam area, and the Stichting Trombosedienst & Artsenlaboratorium Rijnmond (Star-MDC), Rotterdam. We gratefully acknowledge the contribution of children and parents, general practitioners, hospitals, midwives and pharmacies in Rotterdam.

### **GLACIER (Gene-Lifestyle Interactions and Complex Traits Involved in Elevated Disease Risk)**

The authors thank the participants in the GLACIER study, the staff of the Umeå Medical Biobank for preparing the materials, and the Västerbottens Intervention Programme for data collection. The authors also thank K. Enqvist and T. Johansson (Västerbottens County Council, Umeå, Sweden) for DNA preparations and P. Soule, H. Ranu, and D.J. Hunter (Harvard School of Public Health, Boston, MA) for support with genotyping. The GLACIER Study was funded by project grants from Novo Nordisk, the Swedish Heart-Lung Foundation, the Swedish Diabetes Association, the Pahlssons Foundation, the Swedish Research Council, the Umeå Medical Research Foundation, the Heart Foundation of Northern Sweden (all to P.W.F). F.R. was supported by a postdoctoral stipend from the Swedish Heart-Lung Foundation.

### **Health ABC (Health, Aging and Body Composition Study)**

Stephen B. Kritchevsky (Health ABC Investigator) and Melissa Garcia also contributed to the data collection, analyses, and manuscript preparation on behalf of Health ABC. The Health ABC study is supported by the Intramural Research Program of the National Institutes of Health, National Institute on Aging and National Institute on Aging contracts N01-AG-6-2101, N01-AG-6-2103, and N01-AG-6-2106. The Health ABC genome-wide association study was funded by a National Institute on Aging grant, R01-AG032098, and genotyping services were provided by the Center for Inherited Disease Research (CIDR). CIDR is fully funded through a federal contract from the National Institutes of Health to The Johns Hopkins University (contract number HHSN268200782096C).

### **HBCS (Helsinki Birth Cohort Study)**

HBCS has been supported by the the Academy of Finland, the Finnish Diabetes Research Foundation, the Finnish Foundation for Cardiovascular Research, Signe o. Ane Gyllenberg Foundation, the Juho Vainio Foundation, Samfundet Folkhälsan and Finska Läkaresällskapet. We gratefully acknowledge the contribution of all co-workers and study personnel and study participants. MP is partly financially supported for this work by the Finnish Academy SALVE program “Pubgensense” 129322 and by grants from Finnish Foundation for Cardiovascular Research. We are grateful for the THL DNA laboratory for its skillful work to produce the DNA samples used in this study.

### **HCS (Hertfordshire Cohort Study)**

The Hertfordshire Cohort study would like to thank Karen Jameson and Sian Robinson for statistical analysis and dietary data. We also thank all the men and women who took part in the Hertfordshire Cohort Study (HCS) and the HCS research staff. The study was funded by the Medical Research Council, UK.

### **Health 2000 (Health 2000 Survey)**

We thank Paul Knekt and Markus Perola.

### **HERITAGE (HERITAGE Family Study)**

The HERITAGE Family Study is supported by the National Heart, Lung, and Blood Institute Grant HL-45670.

### **INTER99 (INTER99)**

The Inter99 was initiated by Torben Jørgensen (PI), Knut Borch-Johnsen (co-PI), Hans Ibsen and Troels F. Thomsen. The steering committee comprises the former two and Charlotta Pisinger. The study was financially supported by research grants from the Danish Research Council, the Danish Centre for Health Technology Assessment, Novo Nordisk Inc., Research Foundation of Copenhagen County, Ministry of Internal Affairs and Health, the Danish Heart Foundation, the Danish Pharmaceutical Association, the Augustinus Foundation, the Ib Henriksen Foundation, the Becket Foundation, and the Danish Diabetes Association. This project was also funded by the Lundbeck Foundation and produced by The Lundbeck Foundation Centre for Applied Medical Genomics in Personalised Disease Prediction, Prevention and Care (LuCamp, [www.lucamp.org](http://www.lucamp.org)). The Novo Nordisk Foundation Center for Basic Metabolic Research is an independent Research

Center at the University of Copenhagen partially funded by an unrestricted donation from the Novo Nordisk Foundation ([www.metabol.ku.dk](http://www.metabol.ku.dk)). Dr. Tuomas O. Kilpeläinen was supported by grant no. DFF-1333-00124 from the Danish Independent Research Council.

### **InCHIANTI (Invecchiare in Chianti)**

The InCHIANTI study baseline (1998-2000) was supported as a "targeted project" (ICS110.1/RF97.71) by the Italian Ministry of Health and in part by the U.S. National Institute on Aging (Contracts: 263 MD 9164 and 263 MD 821336).

### **MDC (Malmö Diet and Cancer cohort)**

The MDC study was initiated and planned in collaboration with the International Agency for Research on Cancer, the Swedish Cancer Society, Swedish Medical Research Council and the Faculty of Medicine Lund University, Sweden. The study is also funded by Region Skåne, City of Malmö, Pålsson Foundation and the Swedish Heart and Lung Foundation.

### **MESA (The Multi-Ethnic Study of Atherosclerosis)**

MESA and the MESA SHARe project are conducted and supported by contracts N01-HC-95159 through N01-HC-95169 and RR-024156 from the National Heart, Lung, and Blood Institute (NHLBI). Funding for MESA SHARe genotyping was provided by NHLBI Contract N02-HL-6-4278. MESA Family is conducted and supported in collaboration with MESA investigators; support is provided by grants and contracts R01HL071051, R01HL071205, R01HL071250, R01HL071251, R01HL071252, R01HL071258, R01HL071259.

### **MRC Ely (The MRC Ely Study)**

The MRC Ely Study was funded by the Medical Research Council and the Wellcome Trust.

### **NHS (Nurses' Health Study) & HPFS (Health Professionals Follow-up Study)**

The NHS and HPFS were supported by grants DK091718, HL071981, HL073168, CA87969, CA49449, CA055075, HL34594, HL088521, U01HG004399, DK080140, 5P30DK46200, U54CA155626, DK58845, U01HG004728-02, EY015473, DK70756 and DK46200 from the National Institutes of Health, with additional support for genotyping from Merck Research Laboratories, North Wales, PA.

### **NHAPC (Nutrition and Health of Aging Population in China)**

This study is supported by research grants including the National Natural Science Foundation of China (30930081, 81021002), the and National Key Basic Research Program of China (2012CB524900), the National High Technology Research and Development Program (2009AA022704), and the Knowledge Innovation Program (KSCX2-EW-R-10).

We thank all participants of the Nutrition and Health of Aging Population in China, and the local Centers for Disease Control and Prevention staff of Beijing and Shanghai for their assistance with data collection.

### **QFS (Quebec Family Study)**

The Quebec Family study is supported by the Canadian Institutes for Health Research (GR-15187; MOP-77652)

### **ROTTERDAM (The Rotterdam Study)**

The Rotterdam Study investigators thank Pascal Arp, Mila Jhamai, Dr Michael Moorhouse, Marijn Verkerk, and Sander Bervoets for their help in creating the GWAS database. The authors are grateful to the study participants, the staff from the Rotterdam Study and the participating general practitioners and pharmacists. The generation and management of GWAS genotype data for the Rotterdam study was funded by the Netherlands Organisation of Scientific Research NWO Investments (nr. 175.010.2005.011, 911-03-012), the Research Institute for Diseases in the Elderly (014-93-015; RIDE2), the Netherlands Genomics Initiative (NGI)/Netherlands Consortium for Healthy Aging (NCHA) project nr. 050-060-810. ; The Rotterdam study is further funded by Erasmus Medical Center and Erasmus University, Rotterdam, Netherlands Organization for the Health Research and Development (ZonMw), the Research Institute for Diseases in the Elderly (RIDE), the Ministry of Education, Culture and Science, the Ministry for Health, Welfare and Sports, the European Commission (DG XII), and the Municipality of Rotterdam. We would like to thank Dr. Tobias A. Knoch, Luc V. de Zeeuw, Anis Abuseiris, and Rob de Graaf as well as their institutions the Erasmus Computing Grid, Rotterdam, The Netherlands, and especially the national German MediGRID and Services@MediGRID part of the German D-Grid, both funded by the German Bundesministerium fuer Forschung und Technology under grants #01 AK 803 A-H and # 01 IG 07015 G, for access to their grid resources.

### **SP2 (Singapore Prospective Study Program)**

The SP2 was funded by biomedical research council of Singapore individual research grant scheme and the national medical research council of Singapore under the individual research grant and clinician scientist award scheme.

### **SBCGWAS (Shanghai Breast Cancer GWAS Study), SECGS (Shanghai Endometrial Cancer Genetic Study), SDGWAS (Shanghai Diabetes GWAS) & SWHS (Shanghai Women's Health Study)**

These studies were supported in part by U.S. National Institutes of Health grants R37CA070867, R01CA082729, R01CA124558, R01CA148667, and R01CA122364, as well as Ingram Professorship and Research Reward funds from the Vanderbilt University School of Medicine. Participating studies (grant support) in the Shanghai Genome Wide Association Studies are as follows: Shanghai Women's Health Study (R37CA070867), Shanghai Men's Health Study (R01CA82729), Shanghai Breast and Endometrial Cancer Studies (R01CA064277 and R01CA092585). We want to thank Regina Courtney for DNA preparation, Jing He for data processing and analyses.

### **Takahata (Takahata Study)**

This work was supported in part by the Global Center of Excellence Program (No. F03) and a Grant-in-Aid for Scientific Research C (No. 20590595) from the Japan Society for the Promotion of Science, Japan. We thank Hozawa, Atsushi, Kayama Takamasa and Kato Takeo.

**THISEAS (The Hellenic study of Interactions between SNPs & Eating in Atherosclerosis Susceptibility)**

Recruitment for THISEAS was partially funded by a research grant (PENED 2003) from the Greek General Secretary of Research and Technology; we thank all the dieticians and clinicians for their contribution to the project. PD's work forms part of the research themes contributing to the translational research portfolio of Barts Cardiovascular Biomedical Research Unit which is supported and funded by the National Institute for Health Research.

**WGHS (Women's Genome Health Study)**

The WGHS is supported by HL043851, HL080467 and CA047988 from the National Institutes of Health, with collaborative scientific support and funding for genotyping provided by Amgen. We thank Ms. Lynda M. Rose for assistance with statistical programming, and all the participants of the WGHS for their continued cooperation.

**YangPyeong (YangPyeong Cardiovascular Cohort Study)**

We thank Yasuharu Tabara, Tetsuro Miki and Bo Youl Choi.

**YFS (The Cardiovascular Risk in Young Finns)**

The Young Finns Study has been financially supported by the Academy of Finland (grants no. 117797, 126925, 121584, 117941), the Social Insurance Institution of Finland, the Turku University Foundation, the Finnish Cultural Foundation, the Yrjö Jahnsson Foundation, the Emil Aaltonen Foundation (T.L.), Medical Research Fund of Tampere University Hospital, Turku University Hospital Medical Fund, the Juho Vainio Foundation, and the Finnish Foundation for Cardiovascular Research (T.L) and Tampere Tuberculosis Foundation (T.L).

**Other Funding Supports**

Dr. C.E. Smith is supported by the National Heart, Lung, and Blood Institute (NHLBI) grant K08 HL112845.
