# Supplementary material
Source: PubMed Central journal article supplement (PMC4271061)
Supplement: supp_ddu411_ddu411supp_tables.pdf [file supp_ddu411_ddu411supp_tables.pdf]

## Supplemental Tables

**Supplemental Table 1** Study-specific characteristics for studies participating in the meta-analysis

| Study           | Sex   | N    | Age, yr     | BMI, kg/m <sup>2</sup> | Energy, kcal/d | Protein, g/d | Protein, % | Carbohydrate, g/d | Carbohydrate, % | Fat, g/d     | Fat, %      |
|-----------------|-------|------|-------------|------------------------|----------------|--------------|------------|-------------------|-----------------|--------------|-------------|
| ADIGEN_case     | Men   | 161  | 42.5 (5.3)  | 35 (5.2)               | 2329.6 (700)   | 90.4 (25.6)  | 15.8 (2.5) | 262.3 (84.7)      | 45.3 (6.7)      | 83.3 (31.0)  | 31.8 (5.5)  |
| ADIGEN_control  | Men   | 232  | 44.8 (6.3)  | 25.5 (3.2)             | 2498.2 (576)   | 93.9 (22.3)  | 15.2 (2.3) | 262.7 (76.7)      | 42.0 (6.5)      | 90.5 (24.3)  | 32.5 (4.5)  |
| ARIC_W          | Women | 4831 | 53.9 (5.7)  | 26.6 (5.4)             | 1502 (524)     | 68.5 (25.9)  | 18.5 (4.2) | 186.4 (76.7)      | 49.5 (9.3)      | 55.1 (23.5)  | 32.8 (6.8)  |
|                 | Men   | 4319 | 54.7 (5.7)  | 27.4 (4.0)             | 1802 (651)     | 75.8 (28.8)  | 17.1 (3.7) | 213.1 (88.6)      | 47.3 (9.1)      | 68 (30)      | 33.6 (6.8)  |
| ARIC_AA         | Women | 1929 | 53.2 (5.7)  | 30.7 (6.4)             | 1493 (574)     | 68.3 (28.0)  | 18.7 (4.5) | 189.9 (85.9)      | 50.5 (9.6)      | 53.4 (23.6)  | 32.1 (6.5)  |
|                 | Men   | 1133 | 53.8 (6.0)  | 27.9 (4.8)             | 1730 (653)     | 72.9 (28.2)  | 17.3 (3.9) | 210.4 (92.2)      | 48.4 (9.3)      | 61.5 (26.2)  | 32.1 (6.3)  |
| CHS_W           | Women | 1957 | 71.9 (5.2)  | 26.2 (4.9)             | 1953 (621)     | 94.8 (35.4)  | 19.3 (3.2) | 253.6 (75.4)      | 52.8 (8)        | 69.9 (29)    | 31.6 (6)    |
|                 | Men   | 1256 | 72.9 (5.6)  | 26.4 (3.6)             | 2112 (655)     | 98.8 (36.0)  | 18.6 (3.1) | 267 (75.9)        | 51.4 (7.6)      | 79.7 (32)    | 33.4 (5.8)  |
| CHS_AA          | Women | 329  | 74.4 (5.6)  | 29.2 (5.8)             | 1941 (702)     | 85.0 (34.9)  | 17.6 (3.5) | 268.2 (97.9)      | 55.9 (8.8)      | 64.2 (31)    | 29.1 (6.5)  |
|                 | Men   | 189  | 73.7 (4.9)  | 26.4 (4.0)             | 2193 (777)     | 93.8 (37.3)  | 17.2 (3.4) | 287.6 (104.1)     | 53 (8.5)        | 77.3 (34.9)  | 31.1 (6.5)  |
| CLHNS           | Women | 1612 | 48.4 (6.0)  | 24.5 (4.3)             | 1184 (466)     | 43.9 (22.6)  | 14.8 (4.5) | 196.5 (70.9)      | 68.4 (12)       | 22.9 (22.8)  | 15.4 (10.6) |
| CoLaus          | Women | 1601 | 53.6 (10.5) | 24.8 (4.6)             | 1657 (580)     | 63.2 (24.6)  | 15.4 (3.1) | 197.5 (82.6)      | 47.4 (8.8)      | 63.3 (25.5)  | 34.4 (7)    |
|                 | Men   | 1327 | 52.6 (10.7) | 26.3 (3.8)             | 2042 (685)     | 78.0 (28.3)  | 15.4 (3.1) | 232.5 (92.6)      | 45.4 (8.4)      | 77 (30.3)    | 33.9 (6.4)  |
| DILGOM          | Women | 319  | 52.5 (13.8) | 26.6 (5.3)             | 2109 (661)     | 91.5 (30.4)  | 17.5 (2.6) | 251.9 (87.5)      | 47.6 (6)        | 73.3 (26)    | 31.3 (5)    |
|                 | Men   | 292  | 53.9 (12.9) | 26.9 (3.7)             | 2410 (659)     | 104.4 (29.7) | 17.4 (2.5) | 271.2 (85.1)      | 44.9 (5.8)      | 85.4 (27.6)  | 31.8 (5)    |
| EPIC_NL_case    | Women | 1642 | 58.2 (7.7)  | 27.9 (4.7)             | 1754 (444)     | 72.1 (18.3)  | 16.6 (2.6) | 196.2 (55.3)      | 44.9 (6.4)      | 70.5 (23.4)  | 35.8 (5.8)  |
|                 | Men   | 593  | 51.8 (75.5) | 27.8 (39.8)            | 2447 (603)     | 90.4 (21.5)  | 15.0 (2.2) | 265.4 (73.6)      | 43.5 (6.2)      | 98.5 (30.8)  | 36 (5.2)    |
| EPIC_NL_control | Women | 2388 | 53.9 (10.2) | 25.9 (4.3)             | 1845 (464)     | 72.7 (18.3)  | 15.9 (2.4) | 206.9 (58.6)      | 44.9 (6.4)      | 73.6 (23.7)  | 35.6 (5.3)  |
|                 | Men   | 543  | 44.3 (11.1) | 26.2 (3.8)             | 2538 (632)     | 94.0 (24.9)  | 14.9 (2.1) | 281.9 (77.8)      | 44.6 (6.2)      | 100.8 (30.6) | 35.5 (5)    |
| EPIC_Norfolk    | Women | 9622 | 59.1 (9.3)  | 26.1 (4.2)             | 1929 (545)     | 81.1 (20.9)  | 17.2 (3.2) | 244.3 (76)        | 50.7 (6.3)      | 70.9 (27.1)  | 32.6 (6)    |
|                 | Men   | 9483 | 59.7 (9.3)  | 26.5 (3.2)             | 2189 (617)     | 84.8 (21.8)  | 15.9 (2.9) | 268.7 (85.6)      | 49 (6.6)        | 82.8 (30.7)  | 33.6 (5.8)  |
| FamHS           | Women | 1895 | 52.4 (13.4) | 27.5 (6.2)             | 1630 (615)     | 75.4 (30.9)  | 18.7 (4.1) | 212.6 (93.1)      | 52.1 (10.1)     | 54.8 (26.5)  | 30 (7.4)    |
|                 | Men   | 1698 | 52.1 (13.9) | 28.0 (4.6)             | 1899 (673)     | 84.3 (35.3)  | 17.9 (4.1) | 234.6 (95.1)      | 49.6 (9.9)      | 67.2 (30.9)  | 31.5 (7.3)  |
| FDPS            | Women | 162  | 54.6 (6.9)  | 31.6 (4.6)             | 1626 (449)     | 70.5 (23.2)  | 17.4 (3.4) | 174.8 (50.3)      | 43.5 (6.6)      | 68.8 (25.7)  | 37.5 (6.4)  |
|                 | Men   | 76   | 55.5 (7.0)  | 29.8 (3.7)             | 2029 (571)     | 88.6 (24.2)  | 17.8 (3.4) | 208 (55)          | 41.8 (6.9)      | 84.6 (33.8)  | 36.6 (6.6)  |
| Fenland_Met     | Women | 1202 | 46.6 (7.0)  | 26.6 (5.6)             | 1897 (602)     | 84.5 (24.9)  | 18.2 (3.7) | 231 (81.9)        | 48.6 (7)        | 72 (29.4)    | 33.7 (5.9)  |
|                 | Men   | 1047 | 46.9 (7.2)  | 27.2 (4.2)             | 2116 (637)     | 89.3 (25.7)  | 17.2 (3.2) | 248.1 (84.3)      | 46.9 (6.9)      | 81.6 (31)    | 34.3 (5.5)  |
| Fenland_Taq     | Women | 788  | 45.4 (7.2)  | 26.7 (5.4)             | 1828 (546)     | 82.9 (24.3)  | 18.5 (3.6) | 223.2 (74.6)      | 48.8 (6.8)      | 67.7 (26.9)  | 32.8 (5.9)  |
|                 | Men   | 631  | 44.7 (7.4)  | 27.6 (4.0)             | 2093 (633)     | 86.6 (24.1)  | 17.0 (3.3) | 248.7 (85.4)      | 47.5 (6.8)      | 80.4 (31)    | 34.1 (5.6)  |

|               |       |       |             |            |                |              |            |               |             |              |            |
|---------------|-------|-------|-------------|------------|----------------|--------------|------------|---------------|-------------|--------------|------------|
| FHS           | All   | 3064  | 54.7 (9.8)  | 27.4 (4.9) | 1881 (693)     | 77.9 (30.8)  | 16.8 (0.0) | 239.8 (98.1)  | 50.9 (8.5)  | 57.6 (26.7)  | 27.4 (6.1) |
| GEMINAKAR     | Women | 614   | 37.9 (11.1) | 24.0 (3.8) | 2065 (578)     | 81.4 (22.2)  | 16.0 (2.6) | 252.2 (85)    | 48.5 (6.8)  | 71.1 (25)    | 31 (5.8)   |
|               | Men   | 576   | 38.2 (11.8) | 24.8 (3.1) | 2665 (699)     | 106.7 (29.8) | 16.2 (2.6) | 294.6 (91.4)  | 44.2 (6.8)  | 99.9 (32.7)  | 33.6 (5.6) |
| Generation R  | Women | 2548  | 31.4 (4.3)  | 23.2 (4.0) | 2149 (506)     | 79.4 (18.9)  | 14.9 (2.3) | 261.6 (72.9)  | 48.5 (6.1)  | 86.7 (24.1)  | 36.3 (5.3) |
| GLACIER       | Women | 9465  | 51.4 (8.9)  | 25.7 (4.5) | 1493 (476)     | 55.6 (18.4)  | 15.0 (2.1) | 194.2 (65)    | 52.1 (6)    | 53.5 (20.8)  | 32.1 (5.9) |
|               | Men   | 6263  | 53.1 (8.4)  | 26.2 (3.5) | 2036 (653)     | 72.7 (24.8)  | 14.4 (2.1) | 253 (87)      | 49.7 (6.2)  | 80.9 (30.3)  | 35.7 (6.3) |
| HBCS          | Women | 667   | 61.6 (3.0)  | 27.8 (5.1) | 2011 (659)     | 85.5 (30.7)  | 17.1 (2.5) | 237.2 (85.2)  | 47 (6.5)    | 73.5 (27.8)  | 32.9 (5.2) |
|               | Men   | 667   | 61.4 (2.7)  | 27.6 (4.3) | 2398 (723)     | 97.6 (30.2)  | 16.4 (2.4) | 270.5 (94.3)  | 44.9 (6.2)  | 88.9 (30.7)  | 33.4 (5.5) |
| HCS           | Women | 931   | 66.6 (2.7)  | 27.6 (5.0) | 1974 (449)     | 82.3 (17.8)  | 16.9 (2.4) | 269.9 (66.6)  | 54.7 (5.5)  | 70.9 (20.8)  | 32.1 (4.8) |
|               | Men   | 1174  | 65.9 (2.9)  | 27.1 (3.7) | 2269 (536)     | 89.6 (19.1)  | 16.0 (2.3) | 311.7 (81.8)  | 54.9 (5.3)  | 83 (24)      | 32.8 (4.5) |
| Health 2000   | Women | 1754  | 53.8 (17.1) | 26.4 (5.1) | 2166 (684)     | 91.5 (31.0)  | 17.0 (2.2) | 240.6 (79.9)  | 44.5 (5.5)  | 88.1 (31.8)  | 36.4 (4.9) |
|               | Men   | 1290  | 53.3 (15.4) | 26.9 (4.1) | 2380 (729)     | 97.6 (31.1)  | 16.5 (2.2) | 257.7 (86.5)  | 43.3 (5.8)  | 98.3 (34)    | 37.1 (5.2) |
| Health ABC_W  | Women | 711   | 74.6 (2.8)  | 25.9 (4.5) | 1635 (524)     | 59.9 (21.6)  | 14.8 (3.0) | 216.6 (71.9)  | 53.4 (8.2)  | 61.3 (27.4)  | 33.2 (7.8) |
|               | Men   | 798   | 74.9 (2.9)  | 26.9 (3.7) | 1992 (674)     | 71.8 (26.7)  | 14.6 (2.8) | 261.7 (91)    | 52.9 (8.1)  | 73.7 (33.4)  | 32.8 (7.3) |
| Health ABC_AA | Women | 513   | 74.3 (3.0)  | 29.7 (6.0) | 1780 (654)     | 63.0 (25.3)  | 14.3 (3.1) | 236.7 (87.7)  | 53.7 (8.1)  | 68.4 (32)    | 34 (7.2)   |
|               | Men   | 370   | 74.6 (2.8)  | 27.1 (4.3) | 2072 (760)     | 71.1 (29.3)  | 13.8 (3.1) | 268.6 (103.1) | 52.3 (8.9)  | 80.1 (35.2)  | 34.5 (7.3) |
| HERITAGE      | All   | 497   | 35.8 (14.6) | 25.8 (5.0) | 2251 (904)     | 91.2 (35.0)  | 16.4 (3.0) | 293.1 (123.3) | 52.1 (7.5)  | 79.1 (38.2)  | 31.4 (5.6) |
| HPFS_case     | Men   | 1949  | 55.1 (8.8)  | 26.8 (3.8) | 2044 (625)     | 94.8 (30.4)  | 18.8 (3.3) | 234.2 (82.1)  | 45.8 (8.0)  | 75.9 (29.2)  | 33.2 (6.2) |
| HPFS_control  | Men   | 2597  | 55.4 (8.6)  | 25.1 (2.8) | 2024 (610)     | 92.0 (30.1)  | 18.3 (3.2) | 237.3 (83.8)  | 46.9 (8.5)  | 72.5 (28.1)  | 32.0 (6.3) |
| InCHIANTI     | Women | 618   | 68.4 (0.6)  | 27.3 (0.2) | 1789 (20)      | 72.0 (0.8)   | 16.2 (0.1) | 232.3 (2.9)   | 51.9 (0.3)  | 64.4 (0.8)   | 32.4 (0.2) |
|               | Men   | 504   | 66.7 (0.7)  | 27.0 (0.2) | 2296 (26)      | 86.6 (1.0)   | 15.2 (0.1) | 293.3 (3.8)   | 51.1 (0.3)  | 74.4 (1)     | 29.2 (0.2) |
| INTER99       | Women | 2843  | 45.9 (7.9)  | 25.8 (5.1) | 2075.8 (661.4) | 76.5 (15.2)  | 15.2 (2.3) | 269.4 (100.9) | 50.0 (7.8)  | 72.9 (29.9)  | 31.0 (6.9) |
|               | Men   | 2718  | 46.6 (7.8)  | 26.8 (4.0) | 2497.2 (689.7) | 91.1 (24.9)  | 15.0 (2.4) | 288.4 (90.6)  | 44.8 (6.9)  | 97.4 (35.9)  | 34.2 (6.7) |
| MDC           | Women | 13584 | 57.5(8.1)   | 25.4 (4.2) | 2028 (498)     | 76.2 (18.6)  | 16.0 (2.5) | 219.4 (59.9)  | 45.5 (5.9)  | 83.7 (27.5)  | 38.6 (6)   |
|               | Men   | 9108  | 59.6 (7.0)  | 26.2 (3.4) | 2604 (611)     | 94.2 (23.1)  | 15.6 (2.5) | 273.7 (74.2)  | 44.7 (6.1)  | 109.2 (34.3) | 39.7 (6.2) |
| MESA_W        | Women | 1192  | 62.5 (10.4) | 27.5 (5.8) | 1502 (631)     | 62.6 (27.7)  | 16.9 (3.9) | 186.1 (79.1)  | 50.1 (8.5)  | 56.9 (30.3)  | 33.3 (7.3) |
|               | Men   | 1116  | 62.9 (10.1) | 28.0 (4.1) | 1910 (750)     | 74.8 (32.0)  | 15.8 (3.4) | 228.8 (89.7)  | 48.7 (8.7)  | 72.2 (35.5)  | 33.3 (7)   |
| MESA_AA       | Women | 703   | 62.3 (9.9)  | 31.3 (6.2) | 1595 (788)     | 62.8 (34.2)  | 15.8 (3.6) | 203.3 (101.8) | 51.6 (8.9)  | 61.5 (35)    | 34.1 (7.1) |
|               | Men   | 610   | 62.8 (10.2) | 28.5 (4.6) | 1861 (868)     | 70.9 (37.4)  | 15.2 (3.4) | 227.6 (105.1) | 49.7 (8.9)  | 73.4 (40.6)  | 34.9 (7)   |
| MRC Ely       | Women | 835   | 60.9(9.3)   | 27.3 (5.4) | 1814 (515)     | 80.2 (23.0)  | 18.0 (3.4) | 229.1 (70.6)  | 50.6 (6.5)  | 64.9 (24.5)  | 31.8 (5.8) |
|               | Men   | 732   | 61.5 (9.2)  | 27.4 (4.0) | 2044 (649)     | 82.5 (24.2)  | 16.5 (3.1) | 251.2 (91.6)  | 49 (7)      | 76 (30.1)    | 33.1 (6.2) |
| NHAPC         | Women | 1782  | 58.5 (6.1)  | 24.7 (3.8) | 2024 (551)     | 64.7 (23.0)  | 12.8 (2.6) | 301.4 (96)    | 59.5 (9)    | 67.1 (25.7)  | 30 (8.1)   |
|               | Men   | 1363  | 58.9 (5.9)  | 24.1 (3.3) | 2597 (695)     | 80.6 (26.1)  | 12.5 (2.6) | 385.7 (126.6) | 59.3 (10.1) | 76 (28.8)    | 26.7 (8)   |

|                 |       |       |             |            |            |              |            |               |            |              |            |
|-----------------|-------|-------|-------------|------------|------------|--------------|------------|---------------|------------|--------------|------------|
| NHS_case        | Women | 3408  | 54.0 (6.7)  | 27.0 (5.5) | 1797 (540) | 84.1 (26.4)  | 19.0 (3.3) | 217.9 (76.8)  | 48.3 (7.7) | 65.6 (23.7)  | 32.8 (5.8) |
| NHS_control     | Women | 4149  | 54.0 (6.6)  | 24.9 (4.5) | 1779 (512) | 82.4 (25.3)  | 18.7 (3.3) | 215.5 (72.1)  | 48.4 (7.8) | 64.8 (23.1)  | 32.6 (5.8) |
| QFS             | Women | 436   | 40.5 (14.6) | 27.8 (8.5) | 2025 (503) | 81.3 (22.5)  | 16.3 (3.2) | 242.8 (64.4)  | 48.2 (7.1) | 80.1 (27.3)  | 35.2 (6.3) |
|                 | Men   | 337   | 41.7 (15.2) | 27.4 (6.5) | 2703 (650) | 106.3 (27.7) | 15.9 (2.9) | 315.9 (84)    | 47 (7.1)   | 106.9 (35.6) | 35.2 (6.1) |
| ROTTERDAM       | Women | 2680  | 67.9 (8.0)  | 26.7 (4.0) | 1789 (401) | 76.6 (16.6)  | 17.4 (3.1) | 195.8 (52.5)  | 43.9 (6.7) | 72.8 (23.2)  | 36.2 (6.2) |
|                 | Men   | 1894  | 67.1 (7.2)  | 25.8 (2.9) | 2244 (501) | 88.6 (20.7)  | 16.0 (2.8) | 236.9 (66)    | 42.2 (7.1) | 91.9 (28.2)  | 36.5 (6.0) |
| SBCGWAS         | Women | 2551  | 49.9 (8.5)  | 23.9 (3.4) | 1777 (432) | 75.2 (23.0)  | 16.9 (2.8) | 292.5 (71.5)  | 66.2 (7.1) | 34.7 (15.3)  | 17.3 (5.1) |
| SDGWAS          | Women | 886   | 51.3 (6.3)  | 26.7 (3.7) | 1758 (425) | 69.5 (21.8)  | 15.7 (2.6) | 303.4 (72.7)  | 69.4 (6.9) | 29.6 (13.5)  | 14.9 (4.8) |
| SECGS           | Women | 826   | 54.8 (8.7)  | 25.7 (4.1) | 1784 (429) | 73.4 (23.1)  | 16.4 (2.8) | 295.8 (71.1)  | 66.7 (7.3) | 34.1 (15.5)  | 16.9 (5.3) |
| SP2_1M          | Women | 339   | 45.0 (9.4)  | 22.1 (3.6) | 1882 (697) | 72.0 (30.4)  | 15.2 (2.1) | 254.4 (83.4)  | 55.2 (6.9) | 63.8 (32.8)  | 29.5 (5.7) |
|                 | Men   | 558   | 48.2 (10.7) | 23.3 (3.4) | 2176 (712) | 79.1 (28.2)  | 14.5 (1.8) | 305.6 (94.2)  | 56.8 (6.3) | 69.5 (31.4)  | 28 (5.5)   |
| SP2_550         | Women | 78    | 50.1 (14.2) | 23.0 (4.0) | 1805 (689) | 68.3 (28.2)  | 15.1 (1.9) | 256.3 (103.9) | 57 (6.4)   | 56.1 (24.7)  | 27.8 (5.5) |
|                 | Men   | 248   | 49.8 (12.4) | 23.9 (3.4) | 2163 (664) | 78.6 (25.8)  | 14.6 (1.9) | 301.8 (89.1)  | 56.4 (6.3) | 69.9 (29.8)  | 28.4 (5.5) |
| SP2_610         | Women | 735   | 48.7 (10.9) | 22.3 (3.8) | 1802 (660) | 68.7 (27.3)  | 15.3 (2.1) | 247.7 (84.6)  | 55.8 (6.5) | 59.4 (29)    | 28.9 (5.6) |
|                 | Men   | 185   | 48.8 (13.2) | 23.7 (4.4) | 2106 (796) | 77.5 (31.2)  | 14.7 (1.8) | 292.8 (101.6) | 56.8 (7.2) | 68.3 (36.2)  | 28 (6.4)   |
| SWHS            | Women | 2308  | 49.6 (8.5)  | 23.4 (3.3) | 1766 (421) | 73.4 (21.7)  | 16.6 (3.0) | 292.3 (72.2)  | 66.4 (7.1) | 34.3 (14.5)  | 17.3 (5.1) |
| Takahata        | Women | 832   | 61.2 (10.0) | 23.3 (3.4) | 2112 (576) | 76.8 (29.7)  | 14.4 (2.7) | 307.7 (79.8)  | 58.9 (6.7) | 58.8 (22.1)  | 24.7 (4.7) |
|                 | Men   | 624   | 63.3(10.2)  | 23.5 (2.9) | 2403 (664) | 77.4 (28.6)  | 12.8 (2.8) | 345.2 (99.5)  | 57.8 (7.4) | 56 (21.9)    | 20.8 (5.2) |
| THISEAS_case    | Women | 53    | 65.7 (10.8) | 28.5 (4.6) | 1892 (844) | 82.6 (38.3)  | 17.6 (2.9) | 215.2 (95.3)  | 46.3 (8.9) | 77.4 (40.6)  | 36.2 (6.7) |
|                 | Men   | 175   | 61.3 (10.6) | 27.4 (3.6) | 2401 (869) | 103.3 (38.9) | 17.4 (2.9) | 267.5 (107.6) | 44.8 (8)   | 94.4 (39.5)  | 35 (5.9)   |
| THISEAS_control | Women | 221   | 51.8 (12.8) | 29.4 (4.4) | 2444 (819) | 108.5 (39.9) | 17.9 (3.1) | 274.5 (112.2) | 44.9 (9.7) | 99.5 (38.9)  | 36.4 (6.6) |
|                 | Men   | 284   | 57.1 (14.4) | 28.1 (5.2) | 2189 (786) | 94.8 (36.3)  | 17.4 (3.1) | 265.3 (110)   | 48.5 (9.5) | 87.2 (36.5)  | 35.5 (6.8) |
| WGHS            | Women | 22296 | 54.2 (7.1)  | 25.9 (4.9) | 1733 (524) | 81.2 (26.6)  | 18.9 (3.3) | 222.6 (76.6)  | 51.3 (7.9) | 58 (22.2)    | 30 (6.1)   |
| YangPyeong      | Women | 1354  | 56.9 (12.9) | 24.9 (3.4) | 1637 (640) | 61.1 (29.4)  | NA         | 275.9 (102.1) | NA         | 33.3 (23.9)  | NA         |
|                 | Men   | 834   | 58.8 (12.1) | 23.8 (3.0) | 2069 (748) | 81.2 (37.9)  | NA         | 325.0 (117.3) | NA         | 45.5 (29.1)  | NA         |
| YFS             | Women | 917   | 37.8 (5.0)  | 25.2 (4.8) | 2140 (596) | 93.3 (27.7)  | 17.5 (2.3) | 253.7 (79.6)  | 47.2 (5.6) | 76.5 (24)    | 32.2 (4.7) |
|                 | Men   | 709   | 37.6 (5.0)  | 26.5 (4.0) | 2592 (708) | 113.1 (31.7) | 17.6 (2.4) | 287.1 (89.5)  | 44.2 (5.5) | 96.8 (30.6)  | 33.6 (4.8) |

Data are means  $\pm$  SD.

W: white; AA: African American.

**Supplemental Table 2** Results of meta-regression for the association of all study characteristics combined with the effect of *FTO* genetic variants on dietary intakes\*

| Study characteristic                                 | Total energy, kcal/d |          | Protein, % |          | Carbohydrate, % |          | Fat, %  |          |
|------------------------------------------------------|----------------------|----------|------------|----------|-----------------|----------|---------|----------|
|                                                      | Effect†              | <i>P</i> | Effect†    | <i>P</i> | Effect†         | <i>P</i> | Effect† | <i>P</i> |
| Sample size                                          | +                    | 0.24     | -          | 0.64     | +               | 0.82     | -       | 0.34     |
| Mean BMI                                             | -                    | 0.88     | +          | 0.92     | -               | 0.99     | +       | 0.90     |
| Mean age                                             | -                    | 0.13     | -          | 0.46     | +               | 0.95     | -       | 0.20     |
| Median of dietary intake                             | +                    | 0.81     | -          | 0.38     | +               | 0.69     | -       | 0.24     |
| Gender                                               |                      |          |            |          |                 |          |         |          |
| Male (0) vs. female (1)                              | +                    | 0.20     | +          | 0.09     | -               | 0.31     | -       | 0.77     |
| Study design                                         |                      |          |            |          |                 |          |         |          |
| Population- or family-based (0) vs. case-control (1) | -                    | 0.93     | +          | 0.36     | -               | 0.06     | +       | 0.32     |
| Ethnicity                                            |                      |          |            |          |                 |          |         |          |
| White (0) vs. African American (1)                   | +                    | 0.22     | -          | 0.68     | +               | 0.58     | -       | 0.57     |
| White (0) vs. Asian (1)                              | +                    | 0.05     | -          | 0.03     | +               | 0.44     | -       | 0.18     |
| Geographic region                                    |                      |          |            |          |                 |          |         |          |
| North America (0) vs. Europe (1)                     | +                    | 0.86     | -          | 0.006    | +               | 0.03     | -       | 0.11     |
| North America (0) vs. Asia (1)                       | +                    | 0.05     | -          | 0.03     | +               | 0.44     | -       | 0.18     |
| Measurement of dietary intake                        |                      |          |            |          |                 |          |         |          |
| FFQ (0) vs. dietary record or other (1)              | -                    | 0.12     | +          | 0.26     | -               | 0.28     | +       | 0.20     |
| Adjusted for physical activity                       |                      |          |            |          |                 |          |         |          |
| No (0) vs. Yes (1)                                   | +                    | 0.63     | -          | 0.06     | +               | 0.33     | -       | 0.71     |

\*The results are for a meta-regression model where all the listed covariates were entered into the model simultaneously. Ethnicity and geographic region were entered into the model as indicator ('dummy') variables.

†Effect (+) indicates that an increase in the covariate value resulted as a stronger association between *FTO* genetic variants and dietary intakes, whereas effect (-) indicates the opposite.

**Supplemental Table 3** Associations of *FTO* SNP rs9939609 or a proxy with absolutely intakes of protein, carbohydrate and fat in a meta-analysis of 177,330 adults\*

|                             | Fixed effects meta-analysis |                       |                       |                     |                      |                       | Random effects meta-analysis |                      |                     |                      |
|-----------------------------|-----------------------------|-----------------------|-----------------------|---------------------|----------------------|-----------------------|------------------------------|----------------------|---------------------|----------------------|
|                             | Model 1†                    |                       |                       | Model 2‡            |                      |                       | Model 1†                     |                      | Model 2‡            |                      |
|                             | Beta (95% CI)               | <i>P</i>              | <i>I</i> <sup>2</sup> | Beta (95% CI)       | <i>P</i>             | <i>I</i> <sup>2</sup> | Beta (95% CI)                | <i>P</i>             | Beta (95% CI)       | <i>P</i>             |
| <b>Protein (g/day)</b>      |                             |                       |                       |                     |                      |                       |                              |                      |                     |                      |
| Whites                      | 0.29 (0.20, 0.38)           | 8.6×10 <sup>-11</sup> | 34%                   | 0.20 (0.10, 0.27)   | 1.6×10 <sup>-5</sup> | 28%                   | 0.33 (0.20, 0.47)            | 4.9×10 <sup>-7</sup> | 0.23 (0.10, 0.35)   | 1.9×10 <sup>-4</sup> |
| African Americans           | 0.75 (0.15, 1.35)           | 0.02                  | 4%                    | 0.71 (0.12, 1.31)   | 0.02                 | 8%                    | 0.75 (0.13, 1.37)            | 0.02                 | 0.72 (0.08, 1.35)   | 0.03                 |
| Asians                      | 0.20 (-0.20, 0.60)          | 0.32                  | 51%                   | 0.21 (-0.19, 0.61)  | 0.30                 | 52%                   | 0.20 (-0.41, 0.82)           | 0.52                 | 0.21 (-0.40, 0.83)  | 0.50                 |
| All                         | 0.30 (0.22, 0.39)           | 7.9×10 <sup>-12</sup> | 36%                   | 0.20 (0.12, 0.29)   | 2.2×10 <sup>-6</sup> | 33%                   | 0.36 (0.22, 0.49)            | 2.9×10 <sup>-7</sup> | 0.25 (0.12, 0.38)   | 6.3×10 <sup>-5</sup> |
| <b>Carbohydrate (g/day)</b> |                             |                       |                       |                     |                      |                       |                              |                      |                     |                      |
| Whites                      | -0.34 (-0.58, -0.10)        | 0.005                 | 26%                   | -0.20 (-0.44, 0.04) | 0.10                 | 19%                   | -0.40 (-0.74, -0.08)         | 0.02                 | -0.25 (-0.56, 0.06) | 0.12                 |
| African Americans           | -0.63 (-2.07, 0.82)         | 0.39                  | 52%                   | -0.59 (-2.03, 0.86) | 0.43                 | 52%                   | -0.09 (-2.43, 2.24)          | 0.94                 | -0.02 (-2.36, 2.32) | 0.99                 |
| Asians                      | -0.26 (-1.42, 0.89)         | 0.66                  | 19%                   | -0.37 (-1.52, 0.78) | 0.53                 | 18%                   | -0.13 (-1.49, 1.23)          | 0.85                 | -0.24 (-1.59, 1.11) | 0.73                 |
| All                         | -0.35 (-0.58, -0.11)        | 0.003                 | 26%                   | -0.22 (-0.45, 0.02) | 0.07                 | 21%                   | -0.40 (-0.73, -0.06)         | 0.02                 | -0.27 (-0.59, 0.05) | 0.09                 |
| <b>Fat (g/day)</b>          |                             |                       |                       |                     |                      |                       |                              |                      |                     |                      |
| Whites                      | 0.08 (-0.01, 0.17)          | 0.08                  | 0%                    | 0.04 (-0.06, 0.13)  | 0.44                 | 0%                    | 0.08 (-0.01, 0.17)           | 0.08                 | 0.04 (-0.06, 0.13)  | 0.44                 |
| African Americans           | 0.12 (-0.35, 0.59)          | 0.62                  | 10%                   | 0.10 (-0.37, 0.57)  | 0.68                 | 11%                   | 0.06 (-0.46, 0.58)           | 0.82                 | 0.03 (-0.50, 0.55)  | 0.92                 |
| Asians                      | 0.14 (-0.25, 0.53)          | 0.48                  | 0%                    | 0.20 (-0.19, 0.59)  | 0.32                 | 0%                    | 0.14 (-0.25, 0.53)           | 0.48                 | 0.20 (-0.19, 0.59)  | 0.32                 |
| All                         | 0.09 (0.00, 0.18)           | 0.05                  | 0%                    | 0.05 (-0.04, 0.13)  | 0.30                 | 0%                    | 0.09 (0.00, 0.18)            | 0.05                 | 0.05 (-0.04, 0.13)  | 0.30                 |

\*Data are beta (95% CI) per minor allele of rs9939609 or a proxy ( $r^2 > 0.8$ ) for each trait. Analyses from individual studies were conducted separately in men and women, and then combined by meta-analysis of 177,330 adults (154,439 Whites, 5,776 African Americans, and 17,115 Asians).

†Model 1, adjusted for age, physical activity (if available), region (if available), eigenvectors (GWAS data only) and total energy intake.

‡Model 2, further adjusted for BMI.

**Supplemental Table 4** Associations of *FTO* SNP rs9939609 or a proxy with BMI and intakes of total energy, protein, carbohydrate and fat in a random effects meta-analysis of up to 177,330 adults\*

|                                   | Model 1†             |                       |                | Model 2‡            |                      |                |
|-----------------------------------|----------------------|-----------------------|----------------|---------------------|----------------------|----------------|
|                                   | Beta (95% CI)        | <i>P</i>              | I <sup>2</sup> | Beta (95% CI)       | <i>P</i>             | I <sup>2</sup> |
| <b>BMI (kg/m<sup>2</sup>)</b>     |                      |                       |                |                     |                      |                |
| Whites                            | 0.33 (0.28,0.37)     | 3.4×10 <sup>-35</sup> | 46%            | -                   | -                    | -              |
| African Americans                 | 0.00 (-0.20, 0.20)   | 0.98                  | 0%             | -                   | -                    | -              |
| Asians                            | 0.27 (0.11, 0.43)    | 0.001                 | 48%            | -                   | -                    | -              |
| All                               | 0.30 (0.25, 0.35)    | 1.3×10 <sup>-31</sup> | 47%            | -                   | -                    | -              |
| <b>Total energy (kcal/day)</b>    |                      |                       |                |                     |                      |                |
| Whites                            | -8.5 (-12.8, -4.1)   | 2.6×10 <sup>-4</sup>  | 5%             | -7.2 (-11.2, -3.3)  | 3.7×10 <sup>-4</sup> | 0%             |
| African Americans                 | 7.9 (-27.7, 43.5)    | 0.66                  | 40%            | 8.3 (-26.9, 43.6)   | 0.643                | 39%            |
| Asians                            | 10.0 (-11.3, 31.3)   | 0.36                  | 30%            | 8.1 (-12.5, 28.7)   | 0.442                | 26%            |
| All                               | -7.0 (-12.0, -2.03)  | 0.006                 | 18%            | -6.4 (-11.1, -1.8)  | 0.007                | 13%            |
| <b>Protein (% of energy)</b>      |                      |                       |                |                     |                      |                |
| Whites                            | 0.08 (0.06, 0.11)    | 7.7×10 <sup>-10</sup> | 26%            | 0.06 (0.03, 0.08)   | 4.4×10 <sup>-6</sup> | 20%            |
| African Americans                 | 0.15 (0.01, 0.29)    | 0.04                  | 0%             | 0.14 (0.00, 0.28)   | 0.05                 | 5%             |
| Asians                            | 0.07 (-0.06, 0.21)   | 0.30                  | 57%            | 0.07 (-0.06, 0.21)  | 0.30                 | 57%            |
| All                               | 0.09 (0.06, 0.11)    | 1.5×10 <sup>-9</sup>  | 32%            | 0.06 (0.04, 0.09)   | 2.6×10 <sup>-6</sup> | 29%            |
| <b>Carbohydrate (% of energy)</b> |                      |                       |                |                     |                      |                |
| Whites                            | -0.08 (-0.15, -0.01) | 0.02                  | 30%            | -0.05 (-0.11, 0.02) | 0.13                 | 22%            |
| African Americans                 | 0.01 (-0.55, 0.58)   | 0.96                  | 60%            | 0.04 (-0.52, 0.59)  | 0.90                 | 59%            |
| Asians                            | -0.07 (-0.32, 0.18)  | 0.57                  | 0%             | -0.08 (-0.33, 0.17) | 0.53                 | 0%             |
| All                               | -0.08 (-0.15, -0.01) | 0.02                  | 29%            | -0.05 (-0.12, 0.01) | 0.12                 | 23%            |
| <b>Fat (% of energy)</b>          |                      |                       |                |                     |                      |                |
| Whites                            | 0.02 (-0.02, 0.07)   | 0.30                  | 1%             | 0.00 (-0.04, 0.05)  | 0.85                 | 0%             |
| African Americans                 | -0.06 (-0.41, 0.30)  | 0.75                  | 43%            | -0.07 (-0.42, 0.28) | 0.70                 | 42%            |
| Asians                            | 0.07 (-0.12, 0.26)   | 0.47                  | 0%             | 0.08 (-0.11, 0.28)  | 0.39                 | 0%             |
| All                               | 0.03 (-0.02, 0.07)   | 0.24                  | 3%             | 0.01 (-0.03, 0.05)  | 0.69                 | 0%             |

\*Data are beta coefficients (95% CI) per minor allele of rs9939609 or a proxy ( $r^2 > 0.8$ ) for each trait. Analyses from individual studies were conducted separately in men and women, and then combined by meta-analysis of up to 177,330 adults (154,439 Whites, 5,776 African Americans, and 17,115 Asians).

†Model 1, adjusted for age, physical activity (if available), region (if available) and eigenvectors (GWAS data only).

‡Model 2, further adjusted for BMI.

**Supplemental Table 5** Associations of *FTO* SNP rs9939609 (or a proxy) and *MC4R* SNP rs17782313 (or a proxy) with BMI and intakes of total energy, protein, carbohydrate and fat in a fixed effects meta-analysis of up to 177,330 adults\*

|                                   | <i>FTO</i> SNP rs9939609 |                        | <i>MC4R</i> SNP rs17782313 |                       | <i>FTO</i> SNP rs9939609† | <i>P</i> for difference‡ |
|-----------------------------------|--------------------------|------------------------|----------------------------|-----------------------|---------------------------|--------------------------|
|                                   | $\beta$ (95% CI)         | <i>P</i>               | $\beta$ (95% CI)           | <i>P</i>              | Adjusted $\beta$ (95% CI) |                          |
| <b>BMI</b> (kg/m <sup>2</sup> )   | 0.33 (0.30, 0.35)        | 3.6×10 <sup>-107</sup> | 0.23 (0.19, 0.26)          | 5.4×10 <sup>-76</sup> | 0.23 (0.19, 0.26)         | -                        |
| <b>Total energy</b> (kcal/day)    | -6.4 (-10.1, -2.6)       | 0.001                  | -1.0 (-5.3, 3.4)           | 0.66                  | -4.5 (-7.3, -1.7)         | 0.27                     |
| <b>Protein</b> (% of energy)      | 0.08 (0.06, 0.10)        | 2.4×10 <sup>-16</sup>  | 0.02 (-0.01, 0.04)         | 0.10                  | 0.06 (0.04, 0.07)         | 0.008                    |
| <b>Carbohydrate</b> (% of energy) | -0.07 (-0.11, -0.02)     | 0.004                  | 0.02 (-0.04, 0.07)         | 0.59                  | -0.05 (-0.09, -0.02)      | 0.04                     |
| <b>Fat</b> (% of energy)          | 0.03 (-0.02, 0.07)       | 0.24                   | -0.04 (-0.09, 0.01)        | 0.08                  | 0.02 (-0.01, 0.05)        | 0.04                     |

\*Data are beta coefficients (95% CI) per minor allele of the SNPs for each trait. Analyses from individual studies were conducted separately in men and women, and then combined by meta-analysis of up to 177,330 adults (154,439 Whites, 5,776 African Americans, and 17,115 Asians), adjusted for age, physical activity (if available), region (if available) and eigenvectors (GWAS data only).

† Adjusted for the strength of the effect of *MC4R* SNP on BMI: adjusted  $\beta_{FTO-diet} = (\beta_{MC4R-BMI} / \beta_{FTO-BMI}) \times \beta_{FTO-diet}$ ; the variance of adjusted  $\beta_{FTO-diet}$  was calculated as  $\beta_{FTO-diet}^2 \times [(\beta_{MC4R-BMI}^2 / \beta_{FTO-BMI}^4) \times SE_{FTO-BMI}^2 + SE_{MC4R-BMI}^2 / \beta_{FTO-BMI}^2] + (\beta_{MC4R-BMI}^2 / \beta_{FTO-BMI}^2) \times SE_{FTO-diet}^2$ .

‡ *P* for difference between the effect sizes of the *FTO* SNP rs9939609 (adjusted) and the *MC4R* SNP rs17782313 on dietary intake.

**Supplemental Table 6** Associations between intakes of total energy, protein, carbohydrate and fat and BMI in a random effects meta-analysis of up to 177,330 adults

|                                   | Beta (95% CI)*       | <i>P</i>              | <i>I</i> <sup>2</sup> |
|-----------------------------------|----------------------|-----------------------|-----------------------|
| <b>Total energy</b> (kcal/day)    |                      |                       |                       |
| Whites                            | -0.12 (-0.24, 0.00)  | 0.05                  | 85%                   |
| African Americans                 | -0.39 (-0.77, -0.01) | 0.05                  | 40%                   |
| Asians                            | 0.22 (0.05, 0.39)    | 0.01                  | 55%                   |
| All                               | -0.07 (-0.17, 0.04)  | 0.21                  | 83%                   |
| <b>Protein</b> (% of energy)      |                      |                       |                       |
| Whites                            | 0.76 (0.64, 0.87)    | 2.1×10 <sup>-36</sup> | 82%                   |
| African Americans                 | 0.88 (0.43, 1.33)    | 1.2×10 <sup>-4</sup>  | 57%                   |
| Asians                            | 0.12 (-0.09, 0.32)   | 0.27                  | 63%                   |
| All                               | 0.66 (0.55, 0.77)    | 2.6×10 <sup>-29</sup> | 85%                   |
| <b>Carbohydrate</b> (% of energy) |                      |                       |                       |
| Whites                            | -0.38 (-0.50, -0.27) | 1.2×10 <sup>-10</sup> | 83%                   |
| African Americans                 | -0.21 (-0.73, 0.31)  | 0.42                  | 67%                   |
| Asians                            | -0.01 (-0.29, 0.27)  | 0.96                  | 81%                   |
| All                               | -0.31 (-0.42, -0.20) | 4.3×10 <sup>-8</sup>  | 84%                   |
| <b>Fat</b> (% of energy)          |                      |                       |                       |
| Whites                            | 0.26 (0.11, 0.41)    | 0.001                 | 91%                   |
| African Americans                 | 0.15 (-0.39, 0.68)   | 0.59                  | 70%                   |
| Asians                            | -0.04 (-0.31, 0.24)  | 0.80                  | 80%                   |
| All                               | 0.20 (0.07, 0.34)    | 0.002                 | 90%                   |

\*Beta represents difference in BMI (kg/m<sup>2</sup>) comparing the high intake group to the low intake group (dichotomized at median of respective dietary intake variable), adjusted for age, physical activity (if available), region (if available) and eigenvectors (GWAS data only).



**Supplemental Table 7** Results of meta-regression for the association of all study characteristics combined with the *FTO*-diet interaction effect on BMI

| Study characteristic                                 | Total energy, kcal/d |          | Protein, % |          | Carbohydrate, % |          | Fat, % |          |
|------------------------------------------------------|----------------------|----------|------------|----------|-----------------|----------|--------|----------|
|                                                      | Effect               | <i>P</i> | Effect     | <i>P</i> | Effect          | <i>P</i> | Effect | <i>P</i> |
| Sample size                                          | +                    | 0.02     | +          | 0.52     | -               | 0.06     | +      | 0.04     |
| Mean age                                             | +                    | 0.18     | +          | 0.97     | +               | 0.65     | -      | 0.50     |
| Mean BMI                                             | +                    | 0.16     | +          | 0.24     | +               | 0.95     | +      | 0.92     |
| Median of dietary intake                             | +                    | 0.14     | -          | 0.72     | -               | 0.65     | -      | 0.90     |
| Gender                                               |                      |          |            |          |                 |          |        |          |
| Male (0) vs. female (1)                              | +                    | 0.14     | +          | 0.65     | +               | 0.92     | -      | 0.93     |
| Study design                                         |                      |          |            |          |                 |          |        |          |
| Population- or family-based (0) vs. case-control (1) | +                    | 0.27     | +          | 0.43     | -               | 0.64     | +      | 0.91     |
| Ethnicity                                            |                      |          |            |          |                 |          |        |          |
| White (0) vs. African American (1)                   | -                    | 0.03     | -          | 0.48     | +               | 0.80     | +      | 0.45     |
| White (0) vs. Asian (1)                              | +                    | 0.42     | +          | 0.29     | -               | 0.29     | +      | 0.09     |
| Geographic region                                    |                      |          |            |          |                 |          |        |          |
| North America (0) vs. Europe (1)                     | -                    | 0.71     | +          | 0.96     | -               | 0.21     | +      | 0.20     |
| North America (0) vs. Asia (1)                       | +                    | 0.42     | +          | 0.29     | -               | 0.29     | +      | 0.09     |
| Measurement of dietary intake                        |                      |          |            |          |                 |          |        |          |
| FFQ (0) vs diet record or other (1)                  | -                    | 0.07     | +          | 0.25     | +               | 0.64     | -      | 0.07     |
| Adjusted for physical activity                       |                      |          |            |          |                 |          |        |          |
| No (0) vs. Yes (1)                                   | -                    | 0.93     | -          | 0.27     | -               | 0.46     | +      | 0.13     |

The results are for a meta-regression model where all the listed covariates were entered into the model simultaneously. Ethnicity and geographic region were entered into the model as indicator ('dummy') variables.

\*Effect (+) indicates that an increase in the covariate value resulted as a stronger association between *FTO* genetic variants and dietary intakes, whereas effect (-) indicates the opposite.

**Supplemental Table 8** Interaction between *FTO* rs9939609 SNP or a proxy and dietary intakes on BMI in a random effects meta-analysis of up to 177,330 adults\*

|                                   | Beta for interaction (95% CI) | <i>P</i> | <i>I</i> <sup>2</sup> |
|-----------------------------------|-------------------------------|----------|-----------------------|
| <b>Total energy</b> (kcal/day)    |                               |          |                       |
| Whites                            | 0.04 (-0.02, 0.10)            | 0.20     | 5%                    |
| African Americans                 | -0.42 (-0.84, 0.00)           | 0.05     | 7%                    |
| Asians                            | 0.02 (-0.25, 0.30)            | 0.86     | 34%                   |
| All                               | 0.02 (-0.05, 0.09)            | 0.55     | 14%                   |
| <b>Protein</b> (% of energy)      |                               |          |                       |
| Whites                            | 0.00 (-0.06, 0.06)            | 0.90     | 0%                    |
| African Americans                 | -0.11 (-0.51, 0.29)           | 0.58     | 0%                    |
| Asians                            | 0.22 (-0.01, 0.44)            | 0.06     | 0%                    |
| All                               | 0.01 (-0.05, 0.06)            | 0.80     | 0%                    |
| <b>Carbohydrate</b> (% of energy) |                               |          |                       |
| Whites                            | 0.00 (-0.05, 0.06)            | 0.94     | 0%                    |
| African Americans                 | 0.23 (-0.17, 0.64)            | 0.26     | 1%                    |
| Asians                            | -0.19 (-0.42, 0.04)           | 0.10     | 0%                    |
| All                               | 0.00 (-0.06, 0.05)            | 0.87     | 0%                    |
| <b>Fat</b> (% of energy)          |                               |          |                       |
| Whites                            | 0.03 (-0.03, 0.09)            | 0.37     | 0%                    |
| African Americans                 | 0.14 (-0.45, 0.73)            | 0.64     | 49%                   |
| Asians                            | 0.30 (0.07, 0.52)             | 0.01     | 0%                    |
| All                               | 0.04 (-0.03, 0.10)            | 0.24     | 7%                    |

\*Data are betas (95% CI) per minor allele of rs9939609 or a proxy ( $r^2 > 0.8$ ), adjusted for age, physical activity (if available), region (if available) and eigenvectors (GWAS data only). Analyses from individual studies were conducted separately in men and women, and then combined by meta-analysis of up to 177,330 adults (154,439 Whites, 5,776 African Americans, and 17,115 Asians).

**Supplemental Table 9** Studies participating in the meta-analysis

| Study                      |                                                                                        | Study design                                                          | Race/ethnic group | No. of participants |       |       | Region        |
|----------------------------|----------------------------------------------------------------------------------------|-----------------------------------------------------------------------|-------------------|---------------------|-------|-------|---------------|
| Short name                 | Full name                                                                              |                                                                       |                   | All                 | Men   | Women |               |
| ADIGEN <sup>1</sup>        | Adiposity and Genetics                                                                 | Case-control                                                          | White             | 393                 | 393   | 0     | Europe        |
| ARIC <sup>2</sup>          | Atherosclerosis Risk in Communities study                                              | Population-based cohort of adults                                     | White             | 9,150               | 4,319 | 4,831 | North America |
|                            |                                                                                        |                                                                       | African American  | 3,062               | 1,133 | 1,929 |               |
| CHS <sup>3</sup>           | Cardiovascular Health Study                                                            | Community-based cohort of older adults                                | White             | 3,213               | 1,256 | 1,957 | North America |
|                            |                                                                                        |                                                                       | African American  | 518                 | 189   | 329   |               |
| CLHNS <sup>4</sup>         | Cebu Longitudinal Health and Nutrition Survey                                          | Cohort of women who gave birth in 1983-1984                           | Asian             | 1,612               | 0     | 1,612 | Asia          |
| CoLaus <sup>5</sup>        | Cohorte Lausannoise                                                                    | Population-based cohort of adults                                     | White             | 2,928               | 1,327 | 1,601 | Europe        |
| DILGOM <sup>6</sup>        | FINRISK/DILGOM 2007 Study                                                              | Population-based, cross-sectional study of adults                     | White             | 611                 | 292   | 319   | Europe        |
| EPIC_NL <sup>7</sup>       | European Prospective Investigation into Cancer and nutrition -Netherlands              | Case-cohort                                                           | White             | 5,166               | 1,136 | 4,030 | Europe        |
| EPIC_Norfolk <sup>8</sup>  | The European Prospective Investigation into Cancer and Nutrition - Norfolk Study       | Population-based cohort of adults                                     | White             | 19,105              | 9,483 | 9,622 | Europe        |
| FamHS <sup>9</sup>         | NHLBI Family Heart Study                                                               | Family Study                                                          | White             | 3,593               | 1,698 | 1,895 | North America |
| FDPS <sup>10</sup>         | The Finnish Diabetes Prevention Study                                                  | Randomized controlled trial in adults with impaired glucose tolerance | White             | 238                 | 76    | 162   | Europe        |
| Fenland <sup>11</sup>      | The Fenland Study                                                                      | Population-based cohort of adults                                     | White             | 3,668               | 1,678 | 1,990 | Europe        |
| FHS <sup>12</sup>          | Framingham Heart Study                                                                 | Family Study                                                          | White             | 3,064               | 1,630 | 1,434 | North America |
| GEMINAKAR <sup>13</sup>    | Genes and environment in insulin resistance, adiposity and cardiovascular risk factors | Twin Study                                                            | White             | 1,190               | 576   | 614   | Europe        |
| Generation R <sup>14</sup> | The Generation R study                                                                 | Population-based cohort of women                                      | White             | 2,548               | 0     | 2,548 | Europe        |
| GLACIER <sup>15</sup>      | Gene-Lifestyle Interactions and Complex Traits Involved in Elevated Disease Risk       | Population-based cohort of adults                                     | White             | 15,728              | 6,263 | 9,465 | Europe        |
| Health ABC <sup>16</sup>   | Health, Aging and Body Composition Study                                               | Population-based cohort of adults                                     | White             | 1,509               | 798   | 711   | North America |
|                            |                                                                                        |                                                                       | African American  | 883                 | 370   | 513   |               |
| HBCS <sup>17</sup>         | Helsinki Birth Cohort Study                                                            | Birth Cohort                                                          | White             | 1,334               | 667   | 894   | Europe        |
| HCS <sup>18</sup>          | Hertfordshire Cohort Study                                                             | Population-based, cross-sectional study of adults                     | White             | 2,105               | 1,174 | 931   | Europe        |

|                           |                                                                                            |                                                   |                  |        |       |        |               |
|---------------------------|--------------------------------------------------------------------------------------------|---------------------------------------------------|------------------|--------|-------|--------|---------------|
| Health 2000 <sup>19</sup> | Health 2000 Survey                                                                         | Population-based, cross-sectional study of adults | White            | 3,044  | 1,290 | 1,754  | Europe        |
| HERITAGE <sup>20</sup>    | HERITAGE Family Study                                                                      | Family Study                                      | White            | 497    | 240   | 257    | North America |
| HPFS <sup>21</sup>        | Health Professionals Follow-up Study                                                       | Nested case-control                               | White            | 4,564  | 4,564 | 0      | North America |
| InCHIANTI <sup>22</sup>   | Invecchiare in Chianti                                                                     | Population-based cohort of adults                 | White            | 1,122  | 504   | 618    | Europe        |
| INTER99 <sup>23</sup>     | The Inter99 Study                                                                          | Population-based cohort of adults                 | White            | 2,718  | 2,843 | 5,561  | Europe        |
| MDC <sup>24</sup>         | Malmö Diet and Cancer cohort                                                               | Population-based cohort of adults                 | White            | 22,692 | 9,108 | 13,584 | Europe        |
| MESA <sup>25</sup>        | The Multi-Ethnic Study of Atherosclerosis                                                  | Population-based cohort of adults                 | White            | 2,308  | 1,116 | 1,192  | North America |
|                           |                                                                                            |                                                   | African American | 1,313  | 610   | 703    |               |
| MRC Ely <sup>26</sup>     | The MRC Ely Study                                                                          | Population-based cohort of adults                 | White            | 1,567  | 732   | 835    | Europe        |
| NHAPC <sup>27</sup>       | Nutrition and Health of Aging Population in China                                          | Population-based cohort of adults                 | Asian            | 3,145  | 1,363 | 1,782  | Asia          |
| NHS <sup>28</sup>         | Nurses' Health Study                                                                       | Nested case-control                               | White            | 7,557  | 0     | 7,557  | North America |
| QFS <sup>29</sup>         | Quebec Family Study                                                                        | Family Study                                      | White            | 773    | 337   | 436    | North America |
| ROTTERDAM <sup>30</sup>   | The Rotterdam Study                                                                        | Population-based cohort of adults                 | White            | 4,574  | 1,894 | 2,680  | Europe        |
| SP2 <sup>31</sup>         | Singapore Prospective Study Program                                                        | Population-based, cross-sectional study of adults | Asian            | 2,143  | 991   | 1,152  | Asia          |
| SBCGWAS <sup>32</sup>     | Shanghai Breast Cancer GWAS Study                                                          | Case-control                                      | Asian            | 2,551  | 0     | 2,551  | Asia          |
| SECGS <sup>33</sup>       | Shanghai Endometrial Cancer Genetic Study                                                  | Case-control                                      | Asian            | 826    | 0     | 826    | Asia          |
| SDGWAS <sup>34</sup>      | Shanghai Diabetes GWAS                                                                     | Case-control                                      | Asian            | 886    | 0     | 886    | Asia          |
| SWHS <sup>35</sup>        | Shanghai Women's Health Study                                                              | Case-control                                      | Asian            | 2,308  | 0     | 2,308  | Asia          |
| Takahata <sup>36</sup>    | Takahata Study                                                                             | Population-based, cross-sectional study of adults | Asian            | 1,456  | 624   | 832    | Asia          |
| THISEAS <sup>37</sup>     | The Hellenic study of Interactions between SNPs & Eating in Atherosclerosis Susceptibility | Case-control                                      | White            | 733    | 396   | 337    | Europe        |
| WGHS <sup>38</sup>        | Women's Genome Health Study                                                                | Cohort of US female health professionals          | White            | 22,296 | 0     | 22,296 | North America |
| YangPyeong <sup>39</sup>  | YangPyeong Cardiovascular Cohort Study                                                     | Population-based, cross-sectional study of adults | Asian            | 2,188  | 834   | 1,354  | Asia          |
| YFS <sup>40</sup>         | The Cardiovascular Risk in Young Finns                                                     | Population-based cohort of adults                 | White            | 1,626  | 709   | 917    | Europe        |

**Supplemental Table 10** Methods used for measuring BMI and dietary intakes for studies participating in the meta-analysis

| Study        | BMI measurement | Dietary intake measurement         |                                                                                                                                                                                                                                                                                                                                                                                                                                                                                                                                                                                                                                               | BMI and dietary intake measured within 1 year |
|--------------|-----------------|------------------------------------|-----------------------------------------------------------------------------------------------------------------------------------------------------------------------------------------------------------------------------------------------------------------------------------------------------------------------------------------------------------------------------------------------------------------------------------------------------------------------------------------------------------------------------------------------------------------------------------------------------------------------------------------------|-----------------------------------------------|
|              |                 | Measurement                        | Description                                                                                                                                                                                                                                                                                                                                                                                                                                                                                                                                                                                                                                   |                                               |
| ADIGEN       | Measured        | Dietary record                     | A 7-day estimated dietary record developed by Danish Veterinary and Food administration (DVFA) was used. <sup>41</sup> This was based on a 7 day food registration diary.                                                                                                                                                                                                                                                                                                                                                                                                                                                                     | Yes                                           |
| ARIC         | Measured        | Food frequency questionnaire (FFQ) | An interviewer-administered, 66-item semi-quantitative FFQ that was modified from the validated Willett 61-item FFQ. <sup>42</sup> Participants were asked to indicate how often, on average, they consumed various foods and beverages over the past year according to 9 frequency categories, ranging from never or <1 time/month to $\geq 6$ times/day. Standard portion sizes given as a reference for intake estimation. Supplementary questions included regarding frequency of fried food consumption and brand name of the breakfast cereal most commonly consumed (open-ended response).                                             | Yes                                           |
| CHS          | Measured        | FFQ                                | A picture-sort FFQ was used to assess dietary habits of 173 participants recruited at baseline (1989-90). <sup>43</sup> The Willett's FFQ <sup>42</sup> was used to assess dietary habits in 1995-96, and these data were used for the 345 participants recruited in 1992-93.                                                                                                                                                                                                                                                                                                                                                                 | Yes                                           |
| CLHNS        | Measured        | FFQ                                | A picture-sort FFQ was used to assess dietary habits at baseline (1989-90) which was validated against six detailed 24-h diet recall interviews. <sup>43</sup>                                                                                                                                                                                                                                                                                                                                                                                                                                                                                | Yes                                           |
| CoLaus       | Measured        | FFQ                                | Dietary intake was assessed using a FFQ validated for the French-speaking part of Switzerland.                                                                                                                                                                                                                                                                                                                                                                                                                                                                                                                                                | Yes                                           |
| DILGOM       | Measured        | FFQ                                | The validated FFQ was used to measure subject's usual diet over the last 12 months. The questionnaire listed 132 food items, mixed dishes and alcoholic beverages. The subjects were asked to estimate their use frequencies by a nine-point scale: never or rarely to 6+ times per day. The portion sizes were pre-fixed.                                                                                                                                                                                                                                                                                                                    | Yes.                                          |
| EPIC_NL      | Measured        | FFQ                                | Food consumption was assessed using a self-administered FFQ including questions on the usual frequency of consumption of 77 main food categories during the year, preceding enrolment. Further information was collected on consumption frequency for selected sub-items (e.g. skimmed, semi-skimmed or full-fat milk), preparation methods, additions (e.g. sugar), use of dietary supplements, special diets and brand names of fats used on bread and for cooking. Color photographs were used to estimate portion size for 28 food items. Overall, the questionnaire allows the estimation of the average daily consumption of 178 foods. | Yes                                           |
| EPIC_Norfolk | Measured        | FFQ                                | Participants completed a validated 130-item semi-quantitative FFQ about their habitual diet and dietary supplement use in the past year. For all food items, respondents were asked to report the frequency of intake on a 9-point scale (ranging from 'never or less than once per month' to 'more than six times per day') for a 'medium serving or portion'.                                                                                                                                                                                                                                                                               | Yes                                           |
| FamHS        | Measured        | FFQ                                | At the baseline visit (1992-1995), trained interviewers obtained information on usual dietary consumption using a 66-item food questionnaire modified from the FFQ developed by Willett et al. <sup>42</sup> For each item the participant was asked how often, on average, s/he consumed the item during the previous year. Response categories were almost never, 1-3/month, 1/week, 2-4/week, 5-6/week, 1/day, 2-3/day, 4-6/day, and >6/day. Portion sizes were specified to facilitate determination of the number of typical servings and nutrient content. <sup>44</sup>                                                                | Yes                                           |
| FDPS         | Measured        | Dietary record                     | The study subjects completed a 3-day food record at baseline. They were asked to write down everything they ate and drank (except plain drinking water) using a picture booklet of portion sizes of typical foods as the reference. The completeness of the food records was checked at the face-to-face session with the study nutritionist during the study visit.                                                                                                                                                                                                                                                                          | Yes                                           |
| Fenland      | Measured        | FFQ                                | Participants completed a validated 130-item semi-quantitative FFQ about their habitual diet and dietary supplement use in the past year. For all food items, respondents were asked to report the frequency of intake on a 9-point scale (ranging from 'never or less than once per month' to 'more than six times per day') for a 'medium serving or portion'.                                                                                                                                                                                                                                                                               | Yes                                           |
| FHS          | Measured        | FFQ                                | Dietary intake was assessed using the Willett FFQ. <sup>42</sup>                                                                                                                                                                                                                                                                                                                                                                                                                                                                                                                                                                              | Yes                                           |
| GEMINAKAR    | Measured        | FFQ                                | Information about the participants' dietary intake was obtained in 1997-2000 through an extensive                                                                                                                                                                                                                                                                                                                                                                                                                                                                                                                                             | Yes                                           |

|              |                                        |                        |                                                                                                                                                                                                                                                                                                                                                                                                                                                                                                                                                                                                                                                                                                                                                                                                                                                                           |     |
|--------------|----------------------------------------|------------------------|---------------------------------------------------------------------------------------------------------------------------------------------------------------------------------------------------------------------------------------------------------------------------------------------------------------------------------------------------------------------------------------------------------------------------------------------------------------------------------------------------------------------------------------------------------------------------------------------------------------------------------------------------------------------------------------------------------------------------------------------------------------------------------------------------------------------------------------------------------------------------|-----|
|              |                                        |                        | FFQ initially designed for the Danish EPIC study and validated against two 7-day weighed diet records in that study. FFQ were obtained from 1212 subjects (600 complete twin pairs and 12 incomplete twin pairs). The FFQ was based on 1-month recall.                                                                                                                                                                                                                                                                                                                                                                                                                                                                                                                                                                                                                    |     |
| Generation R | Measured                               | FFQ                    | We assessed dietary intake using a modified version of the validated semi-quantitative FFQ of Klipstein-Grobusch et al. <sup>45</sup> This FFQ considered food intake over the prior three months. The FFQ consists of 293 items structured according to meal pattern. Questions include consumption frequency, portion size, preparation method, and additions. Portion sizes were estimated using Dutch household measures and photographs of foods showing different portion sizes. To calculate average daily nutritional values we used the Dutch food composition table 2006.                                                                                                                                                                                                                                                                                       | Yes |
| GLACIER      | Measured                               | FFQ                    | Using a 66-item, self-administered FFQ, <sup>46</sup> participants were asked to indicate how often, on average, they consumed various foods and beverages over the past year according to 9 frequency categories, ranging from never to 4 or more a day. Participants indicated their average portion of (1) potato/pasta/rice, (2) vegetables and (3) meat/ground meat/sausages by comparison with four colour photos illustrating four plates with increasing portion sizes of potato, vegetables and meat. For the other food items, we assumed a standard portion size value (as described by the National Food administration's statistics database, www.slv.se). Dietary information was judged as unreliable and excluded from further analysis if estimated energy intake was <2.5% or >95% for the entire Northern Sweden FFQ database (N=93,000 observations). | Yes |
| Health ABC   | Measured                               | FFQ                    | 108-item interviewer-administered FFQ administered in 1998-99 (Block Dietary Data Systems, Berkeley, CA). The Health ABC FFQ food list was developed specifically for Health ABC using 24-hour recalls obtained in NHANES III from older (> 65 years) non-Hispanic white and black adults residing in the Northeast or the South. Trained interviewers used wood blocks, food models, standard kitchen measures, and flash cards to help participants estimate portion sizes for each food. Interviews were periodically monitored throughout the study to ensure the quality and consistency of the data collection procedures. The Health ABC FFQ was analyzed for micro- and macronutrient content by Block Dietary Data Systems.                                                                                                                                      | Yes |
| HBCS         | Measured                               | FFQ                    | The validated FFQ was used to measure subject's usual diet over the last 12 months. The questionnaire listed 128 food items, mixed dishes and alcoholic beverages. The subjects were asked to estimate their use frequencies by a nine-point scale: never or rarely to 6+ times per day. The portion sizes were pre-fixed.                                                                                                                                                                                                                                                                                                                                                                                                                                                                                                                                                | Yes |
| HCS          | Measured                               | FFQ                    | Diet was assessed using a FFQ, based on the EPIC questionnaire, which was administered by a trained research nurse. The FFQ included 129 foods and food groups and was used to assess an average frequency of consumption of the listed foods over a 3-month period preceding the home interview. Nutrient intakes were calculated by multiplying the frequency of consumption of a portion of each food by its nutrient content according to the UK national food composition database or manufacturers' composition data.                                                                                                                                                                                                                                                                                                                                               | Yes |
| Health 2000  | 87.9% measured and 12.1% self-reported | FFQ                    | The validated FFQ was used to measure subject's usual diet over the last 12 months. The questionnaire listed 128 food items, mixed dishes and alcoholic beverages. The subjects were asked to estimate their use frequencies by a nine-point scale: never or rarely to 6+ times per day. The portion sizes were pre-fixed.                                                                                                                                                                                                                                                                                                                                                                                                                                                                                                                                                | Yes |
| HERITAGE     | Measured                               | FFQ                    | Dietary intake was assessed using the Willett FFQ. <sup>42</sup>                                                                                                                                                                                                                                                                                                                                                                                                                                                                                                                                                                                                                                                                                                                                                                                                          | Yes |
| HPFS         | Self-reported                          | FFQ                    | Dietary intake was assessed using the Willett FFQ. <sup>42</sup>                                                                                                                                                                                                                                                                                                                                                                                                                                                                                                                                                                                                                                                                                                                                                                                                          |     |
| InCHIANTI    | Measured                               | FFQ                    | Dietary intake was assessed using a FFQ created for the European Prospective Investigation into Cancer and nutrition (EPIC) study, and has previously been validated to provide good estimates of dietary intake in this study population.                                                                                                                                                                                                                                                                                                                                                                                                                                                                                                                                                                                                                                | Yes |
| INTER99      | Measured                               | FFQ                    | Food frequency questionnaire was used to record the dietary data. <sup>47</sup>                                                                                                                                                                                                                                                                                                                                                                                                                                                                                                                                                                                                                                                                                                                                                                                           | Yes |
| MDC          | Measured                               | FFQ and dietary record | Combination of a quantitative 168-item food frequency questionnaire, a 7-day dietary diary (of cooked lunch and dinner meals) and a 1-hour interview                                                                                                                                                                                                                                                                                                                                                                                                                                                                                                                                                                                                                                                                                                                      | Yes |

|            |               |                        |                                                                                                                                                                                                                                                                                                                                                                                                                                                                                                                                                                                                                                                                                                                                                             |     |
|------------|---------------|------------------------|-------------------------------------------------------------------------------------------------------------------------------------------------------------------------------------------------------------------------------------------------------------------------------------------------------------------------------------------------------------------------------------------------------------------------------------------------------------------------------------------------------------------------------------------------------------------------------------------------------------------------------------------------------------------------------------------------------------------------------------------------------------|-----|
| MESA       | Measured      | FFQ                    | Block-style FFQ, modified from FFQ used in the IRAS cohort to include Chinese foods/culinary practices                                                                                                                                                                                                                                                                                                                                                                                                                                                                                                                                                                                                                                                      | Yes |
| MRC Ely    | Measured      | FFQ                    | Participants completed a validated 130-item semi-quantitative FFQ about their habitual diet and dietary supplement use in the past year. For all food items, respondents were asked to report the frequency of intake on a 9-point scale (ranging from 'never or less than once per month' to 'more than six times per day') for a 'medium serving or portion'.                                                                                                                                                                                                                                                                                                                                                                                             | Yes |
| NHAPC      | Measured      | FFQ                    | Dietary intake was assessed with a 74-item FFQ modified from the FFQ used in the national Survey on the Status of Nutrition and Health of the Chinese People in 2002. The food-composition values were obtained from the Chinese Food Composition Table.                                                                                                                                                                                                                                                                                                                                                                                                                                                                                                    | Yes |
| NHS        | Self-reported | FFQ                    | Dietary intake was assessed using the Willett FFQ. <sup>42</sup>                                                                                                                                                                                                                                                                                                                                                                                                                                                                                                                                                                                                                                                                                            |     |
| QFS        | Measured      | Dietary record         | Dietary intake was assessed by a 3-day dietary record, which was completed during 2 weekdays and 1 weekend day. Subjects were asked to record all food and beverage ingested,                                                                                                                                                                                                                                                                                                                                                                                                                                                                                                                                                                               | Yes |
| ROTTERDAM  | Measured      | FFQ                    | Dietary assessment followed a two-step procedure: 1) A simple self-administered questionnaire was first completed at home, only questions were asked about which food items were consumed; no questions about portion sizes (or frequency) were asked during this step. 2) A subsequent structured interview was later conducted at the research center with a trained dietitian. Participants were asked to indicate how often, on average, they consumed various foods and beverages over the past year according to 9 frequency categories, ranging from never or <1 time/month to =6 times/day. Portion sizes were presented in natural units (eg. slices of bread) or household measures (e.g., cups, bowls, tablespoons, plates, etc.). <sup>45</sup> | Yes |
| SP2        | Measured      | Other                  | Whether and the reason of changing diet over the last 1 month was firstly asked. Then the questions about the food intake over the last 1 month was divided into several parts, including bread, rice and Porridge, noodles, soups, vegetables and bean curd, salad, fruits, poultry, meat, fish, desserts, eggs, Biscuits, Pastries and Cakes, fast foods, nuts, tidbits/snacks, milk used with beverages with/without sugar, milk & dairy Products, soya products and alcohol. For each kind of food, the amount and frequency were both recorded. Finally, the oil or fat used in cooking was also questioned.                                                                                                                                           | Yes |
| SBCGWAS    | Measured      | FFQ                    | Dietary intake was assessed using a validated 77-item semi-quantitative questionnaire that covers about 90% of commonly consumed foods in urban Shanghai in 1996. <sup>48</sup>                                                                                                                                                                                                                                                                                                                                                                                                                                                                                                                                                                             | Yes |
| SECGS      | Measured      | FFQ                    | Dietary intake was assessed using a validated 77-item semi-quantitative questionnaire that covers about 90% of commonly consumed foods in urban Shanghai in 1996. <sup>48</sup>                                                                                                                                                                                                                                                                                                                                                                                                                                                                                                                                                                             | Yes |
| SDGWAS     | Measured      | FFQ                    | Dietary intake was assessed using a validated 77-item semi-quantitative questionnaire that covers about 90% of commonly consumed foods in urban Shanghai in 1996. <sup>48</sup>                                                                                                                                                                                                                                                                                                                                                                                                                                                                                                                                                                             | Yes |
| SWHS       | Measured      | FFQ                    | Dietary intake was assessed using a validated 77-item semi-quantitative questionnaire that covers about 90% of commonly consumed foods in urban Shanghai in 1996. <sup>48</sup>                                                                                                                                                                                                                                                                                                                                                                                                                                                                                                                                                                             | Yes |
| Takahata   | Measured      | Other                  | The brief self-administered diet history questionnaire (BDHQ), which requires the recall of dietary habits over a 1-month period. <sup>49</sup>                                                                                                                                                                                                                                                                                                                                                                                                                                                                                                                                                                                                             | Yes |
| WGHS       | Self-report   | FFQ                    | Dietary intake was assessed using the Willett FFQ. <sup>42</sup>                                                                                                                                                                                                                                                                                                                                                                                                                                                                                                                                                                                                                                                                                            | Yes |
| YangPyeong | Measured      | FFQ and dietary record | Dietary intake was assessed using 24-h diet recall (n=1,065) and/or FFQ (n=1,123).                                                                                                                                                                                                                                                                                                                                                                                                                                                                                                                                                                                                                                                                          | Yes |
| YFS        | Measured      | FFQ                    | Information on food consumption and nutrient intakes were collected using a modified 131-item FFQ.                                                                                                                                                                                                                                                                                                                                                                                                                                                                                                                                                                                                                                                          | Yes |
| THISEAS    | Measured      | FFQ                    | Dietary assessment data was collected through face to face interview by well-trained scientists. A semi-quantitative 172-item questionnaire was used to assess dietary intake. Participants were asked to indicate how often they consumed various foods and beverages, as well as the portion size by comparison with photos. Frequency response categories were: never; 1–3 times/month; 1–2 times/week; 3–4 times/week; 5–6 times/week; 1time/day.                                                                                                                                                                                                                                                                                                       | Yes |

**Supplemental Table 11** Genotyping methods and quality control for the *FTO* SNP in all studies participating in the meta-analysis

| Study           | SNP        | $r^2$ | Genotyped or imputed | Imputation quality | Method                                                      | Minor allele | Men  |           |           |                  | Women |           |           |                  |
|-----------------|------------|-------|----------------------|--------------------|-------------------------------------------------------------|--------------|------|-----------|-----------|------------------|-------|-----------|-----------|------------------|
|                 |            |       |                      |                    |                                                             |              | MAF  | Call rate | $P_{HWE}$ | Concordance rate | MAF   | Call rate | $P_{HWE}$ | Concordance rate |
| ADIGEN          | rs3751812  | 1     | Imputed              | -                  | Illumina 610 K quad chips, MACH 1.0                         | T            | 0.46 | 0.88      | 0.44      | 0.99             | -     | -         | -         | -                |
| ARIC_W          | rs9939609  | -     | Genotyped            | -                  | Affymetrix 6.0 chip                                         | A            | 0.41 | 1         | 0.70      | NA               | 0.40  | 1         | 0.37      | NA               |
| ARIC_AA         | rs9939609  | -     | Genotyped            | -                  | Affymetrix 6.0 chip                                         | A            | 0.47 | 1         | 0.37      | NA               | 0.47  | 1         | 0.37      | NA               |
| CHS_W           | rs9939609  | -     | Imputed              | 1                  | MACH                                                        | A            | 0.39 | NA        | NA        | NA               | 0.39  | NA        | NA        | NA               |
| CHS_AA          | rs9939609  | -     | Genotyped            | -                  | IBC Illumina iSELECT chip                                   | A            | 0.50 | 0.95      | 0.38      | NA               | NA    | 0.95      | NA        | NA               |
| CLHNS           | rs9939609  | -     | Genotyped            | -                  | TaqMan allelic discrimination                               | A            | -    | -         | -         | -                | 0.18  | 0.97      | 0.27      | 1                |
| CoLaus          | rs9939609  | -     | Imputed              | 1                  | IMPUTE 0.2.0                                                | A            | 0.42 | NA        | 0.74      | NA               | 0.41  | NA        | 0.35      | NA               |
| DILGOM          | rs9939609  | -     | Imputed              | 1                  | MACH 1.0.10                                                 | A            | 0.39 | 1         | 0.62      | NA               | 0.41  | 1         | 0.49      | NA               |
| EPIC_NL_control | rs9939609  | -     | Genotyped            | -                  | IBC CVD chip                                                | A            | 0.40 | 1         | 0.51      | NA               | 0.39  | 1         | 0.55      | NA               |
| EPIC_NL_case    | rs9939609  | -     | Genotyped            | -                  | IBC CVD chip                                                | A            | 0.38 | 1         | 0.13      | NA               | 0.40  | 1         | 0.37      | NA               |
| EPIC_Norfolk    | rs1121980  | 0.84  | Genotyped            | -                  | TaqMan SNP Genotyping Assays                                | A            | 0.43 | 0.98      | 0.72      | 0.99             | 0.43  | 0.98      | 0.72      | 0.98             |
| FamHS           | rs9939609  | -     | Imputed              | 1                  | MACH 1.0.16                                                 | A            | 0.41 | NA        | NA        | NA               | 0.40  | NA        | NA        | NA               |
| FDPS            | rs11075989 | 1     | Genotyped            | -                  | Illumina Cardio-MetaboChip                                  | T            | 0.42 | 1         | 0.87      | NA               | 0.43  | 1         | 0.31      | NA               |
| Fenland         | rs9939609  | -     | Genotyped            | -                  | MetaboChip                                                  | A            | 0.40 | 1         | 0.44      | 1                | 0.39  | 1         | 0.44      | 1                |
| Fenland         | rs1121980  | 0.84  | Genotyped            | -                  | TaqMan SNP Genotyping Assays                                | A            | 0.41 | 0.97      | 0.17      | 1                | 0.42  | 0.97      | 0.17      | 1                |
| FHS*            | rs9939609  | -     | Imputed              | 0.99               | MACH 1.0.15                                                 | A            | 0.39 | NA        | NA        | NA               | -     | -         | -         | -                |
| GEMINAKAR       | rs9939609  | -     | Genotyped            | -                  | TaqMan SNP Genotyping Assays                                | T            | 0.41 | 0.99      | 0.84      | NA               | 0.41  | 0.99      | 0.84      | NA               |
| Generation R    | rs8050136  | 1     | Genotyped            | -                  | TaqMan allelic discrimination assay                         | A            | -    | -         | -         | -                | 0.38  | 0.97      | 0.90      | 0.93             |
| GLACIER         | rs9939609  | -     | Genotyped            | -                  | TaqMan SNP Genotyping Assays                                | A            | 0.41 | 0.94      | 0.96      | 0.99             | 0.42  | 0.98      | 0.02      | 0.99             |
| Health ABC_W    | rs9939609  | -     | Imputed              | 1                  | MACH-1.0.16.a                                               | A            | 0.42 | NA        | NA        | NA               | 0.42  | NA        | NA        | NA               |
| Health ABC_AA   | rs9939609  | -     | Imputed              | 1                  | MACH-1.0.16.a                                               | A            | 0.45 | NA        | NA        | NA               | 0.46  | NA        | NA        | NA               |
| HBCS            | rs9939609  | -     | Imputed              | 1                  | MACH 1.0.10                                                 | A            | 0.39 | 1         | 0.14      | NA               | 0.41  | 1         | 0.41      | NA               |
| HCS             | rs9939609  | -     | Genotyped            | -                  | Fluorescence-based competitive allele-specific PCR (KASPar) | A            | 0.40 | 0.98      | 0.44      | 1                | 0.4   | 0.98      | 0.44      | 1                |
| Health 2000     | rs9939609  | -     | Genotyped            | -                  | Sequenom iPLEX Gold assay (Sequenom Inc.)                   | A            | 0.40 | 0.98      | 0.09      | 1                | 0.4   | 0.98      | 0.09      | 1                |
| HERITAGE*       | rs8050136  | 1     | Genotyped            | -                  | Illumina GoldenGate assay                                   | A            | 0.38 | 1         | 0.27      | 1                | -     | -         | -         | -                |
| HPFS-control    | rs9939609  | -     | Genotyped            | -                  | Affymetrix or Illumina chips                                | A            | 0.42 | 0.98      | 0.58      | NA               | -     | -         | -         | -                |
| HPFS-case       | rs9939609  | -     | Genotyped            | -                  | Affymetrix or Illumina chips                                | A            | 0.44 | 0.98      | 0.56      | NA               | -     | -         | -         | -                |
| InCHIANTI       | rs9939609  | -     | Imputed              | 1                  | MACH1.0.                                                    | A            | 0.46 | NA        | NA        | NA               | 0.44  | NA        | NA        | NA               |
| INTER99         | rs9939609  | 1     | Genotyped            | -                  | Illumina Human Cardio-metabo Chip, GenCall                  | A            | 0.41 | 99.9      | 0.40      | 0.99             | 0.41  | 99.9      | 0.40      | 0.99             |



|                 |           |   |           |      |                                                             |   |      |      |      |      |      |      |       |      |
|-----------------|-----------|---|-----------|------|-------------------------------------------------------------|---|------|------|------|------|------|------|-------|------|
| MDC             | rs9939609 | - | Genotyped | -    | Sequenom MassARRAY platform or TaqMan SNP Genotyping Assays | A | 0.41 | 0.98 | 0.66 | NA   | 0.41 | 0.98 | 0.66  | NA   |
| MESA_W          | rs9939609 | - | Genotyped | -    | Affymetrix 6.0 chip                                         | A | 0.42 | 1    | 0.76 | NA   | 0.40 | 1    | 0.01  | NA   |
| MESA_AA         | rs9939609 | - | Genotyped | -    | Affymetrix 6.0 chip                                         | A | 0.47 | 1    | 0.14 | NA   | 0.49 | 1    | 0.37  | NA   |
| MRC Ely         | rs9939609 | - | Genotyped | -    | Metabochip                                                  | A | 0.39 | 1    | 0.64 | 1    | 0.39 | 1    | 0.64  | 1    |
| NHAPC           | rs9939609 | - | Genotyped | -    | GenomeLab SNPstream Genotyping System (Beckman Coulter)     | A | 0.11 | 0.99 | 0.01 | 0.99 | 0.11 | 1    | 0.22  | 0.99 |
| NHS-control     | rs9939609 | - | Genotyped | -    | Affymetrix or Illumina chips                                | A | -    | -    | -    | -    | 0.40 | 0.98 | 0.60  | NA   |
| NHS-case        | rs9939609 | - | Genotyped | -    | Affymetrix or Illumina chips                                | A | -    | -    | -    | -    | 0.41 | 0.98 | 0.59  | NA   |
| QFS             | rs9939609 | - | Genotyped | -    | Sequenom iPLEX Gold Assay (Sequenom, Cambridge, MA)         | A | 0.39 | NA   | 0.40 | NA   | 0.39 | NA   | 0.40  | NA   |
| ROTTERDAM       | rs9939609 | - | Imputed   | 1    | MACH                                                        | A | 0.37 | NA   | 0.28 | NA   | 0.38 | NA   | 0.55  | NA   |
| SP2             | rs9939609 | - | Imputed   | 1    | IMPUTE v0.5                                                 | A | NA    | NA   |
| SWHS            | rs9939609 | - | Genotyped | -    | Affymetrix 6.0 chip                                         | A | -    | -    | -    | -    | 0.12 | 1    | 0.004 | NA   |
| Takahata*       | rs9939609 | - | Genotyped | -    | Fluorogenic polymerase chain reaction (TaqMan)              | A | 0.20 | 0.89 | 0.19 | NA   | -    | -    | -     | -    |
| WGHS            | rs9939609 | - | Imputed   | 0.99 | MACH 1.0.15                                                 | A | -    | -    | -    | -    | 0.4  | 0.98 | 0.10  | NA   |
| YangPyeong      | rs9939609 | - | Genotyped | -    | TaqMan SNP Genotyping Assays                                | A | 0.12 | 1    | 0.54 | NA   | 0.12 | 1    | 0.75  | NA   |
| YFS             | rs9939609 | 1 | Imputed   | 1    | MACH 1.0                                                    | A | 0.40 | NA   | NA   | NA   | 0.40 | NA   | NA    | NA   |
| THISEAS_control | rs9939609 | - | Genotyped | -    | Metabochip                                                  | A | 0.45 | 0.92 | 0.05 | NA   | 0.40 | 0.89 | 0.19  | NA   |
| THISEAS_case    | rs9939609 | - | Genotyped | -    | Metabochip                                                  | A | 0.46 | 0.89 | 0.63 | NA   | 0.44 | 0.85 | 0.37  | NA   |

$r^2$ : correlation coefficient with rs9939609; MAF: minor allele frequency;  $P_{HWE}$ :  $P$ -values for Hardy–Weinberg equilibrium.

\*These studies provided data in men and women combined.

**Supplemental Table 12** Genotyping methods and quality control for the *MC4R* SNP in all studies participating in the meta-analysis

| Study           | SNP        | r <sup>2</sup> | Genotyped or imputed | Imputation quality | Method                                                      | Minor allele | Men  |           |                         |                  | Women |           |                         |                  |
|-----------------|------------|----------------|----------------------|--------------------|-------------------------------------------------------------|--------------|------|-----------|-------------------------|------------------|-------|-----------|-------------------------|------------------|
|                 |            |                |                      |                    |                                                             |              | MAF  | Call rate | <i>P</i> <sub>HWE</sub> | Concordance rate | MAF   | Call rate | <i>P</i> <sub>HWE</sub> | Concordance rate |
| ADIGEN          | rs10871777 | 0.96           | Imputed              | -                  | Illumina 610 K quad chips, MACH 1.0                         | G            | 0.27 | 0.88      | 0.41                    | 0.99             | -     | -         | -                       | -                |
| ARIC_W          | rs17782313 | -              | Genotyped            | -                  | Affymetrix 6.0 chip                                         | C            | 0.23 | 1         | 0.70                    | NA               | 0.23  | 1         | 0.70                    | NA               |
| ARIC_AA         | rs17782313 | -              | Genotyped            | -                  | Affymetrix 6.0 chip                                         | C            | 0.28 | 1         | 0.70                    | NA               | 0.30  | 1         | 0.70                    | NA               |
| CHS_W           | rs17782313 | -              | Imputed              | 0.94               | MACH                                                        | C            | 0.24 | NA        | NA                      | NA               | 0.24  | NA        | NA                      | NA               |
| CLHNS           | rs17782313 | -              | Genotyped            | -                  | Affymetrix Genome-Wide Human SNP Array 5.0                  | C            | -    | NA        | -                       | NA               | 0.12  | 1         | 0.11                    | 1                |
| CoLaus          | rs17782313 | -              | Genotyped            | 1                  | Affimatrix GeneChip® Human Mapping 500K array set           | C            | 0.23 | 1         | 0.32                    | NA               | 0.25  | 1         | 0.89                    | NA               |
| DILGOM          | rs17782313 | -              | Imputed              | 1                  | MACH 1.0.10f                                                | C            | 0.17 | 1         | 0.54                    | NA               | 0.21  | 1         | 0.49                    | NA               |
| EPIC_NL_control | rs17782313 | -              | Genotyped            | -                  | IBC CVD chip                                                | C            | 0.23 | 1         | 0.84                    | NA               | 0.26  | 1         | 0.88                    | NA               |
| EPIC_NL_case    | rs17782313 | -              | Genotyped            | -                  | IBC CVD chip                                                | C            | 0.28 | 1         | 0.07                    | NA               | 0.27  | 1         | 0.89                    | NA               |
| EPIC_Norfolk    | rs17782313 | -              | Genotyped            | -                  | TaqMan SNP Genotyping Assays                                | C            | 0.24 | 0.99      | 0.38                    | 0.99             | 0.23  | 0.99      | 0.38                    | 0.99             |
| FamHS           | rs17782313 | -              | Imputed              | 1                  | MACH 1.0.16                                                 | C            | 0.47 | NA        | NA                      | NA               | 0.40  | NA        | NA                      | NA               |
| FDPS            | rs10871777 | 1              | Genotyped            | -                  | Illumina Cardio-MetaboChip                                  | G            | 0.17 | 1         | 0.17                    | NA               | 0.19  | 1         | 0.59                    | NA               |
| Fenland         | rs17782313 | -              | Genotyped            | -                  | MetaboChip                                                  | C            | 0.25 | 1         | 0.15                    | 1                | 0.23  | 1         | 0.15                    | 1                |
| Fenland         | rs17782313 | -              | Genotyped            | -                  | TaqMan SNP Genotyping Assays                                | C            | 0.24 | 0.96      | 0.88                    | 1                | 0.26  | 0.96      | 0.88                    | 1                |
| FHS*            | rs17782313 | -              | Imputed              | 1.02               | MACH 1.0.15                                                 | C            | 0.22 | NA        | NA                      | NA               | -     | -         | -                       | -                |
| GEMINAKAR       | rs17782313 | -              | Genotyped            | -                  | TaqMan SNP Genotyping Assays                                | T            | 0.21 | 0.99      | 0.91                    | NA               | 0.21  | 0.99      | 0.91                    | NA               |
| GLACIER         | rs17782313 | -              | Genotyped            | -                  | TaqMan SNP Genotyping Assays                                | C            | 0.26 | 0.94      | 0.02                    | 0.99             | 0.27  | 0.98      | 0.14                    | 0.99             |
| Health ABC_W    | rs17782313 | -              | Imputed              | 1                  | MACH-1.0.16.a                                               | C            | 0.22 | NA        | NA                      | NA               | 0.24  | NA        | NA                      | NA               |
| Health ABC_AA   | rs17782313 | -              | Imputed              | 1                  | MACH-1.0.16.a                                               | C            | 0.31 | NA        | NA                      | NA               | 0.31  | NA        | NA                      | NA               |
| HBCS            | rs17782313 | -              | Imputed              | 1                  | MACH 1.0.10                                                 | C            | 0.18 | 1         | 0.36                    | NA               | 0.19  | 1         | 0.02                    | NA               |
| HCS             | rs17782313 | -              | Genotyped            | -                  | TaqMan® SNP genotyping assay                                | C            | 0.24 | 0.98      | 0.01                    | 1                | 0.24  | 0.98      | 0.01                    | 1                |
| Health 2000     | rs17782313 | -              | Genotyped            | -                  | Sequenom iPLEX Gold assay (Sequenom Inc.)                   | C            | 0.18 | 0.98      | 0.32                    | 1                | 0.18  | 0.98      | 0.32                    | 1                |
| HERITAGE*       | rs17782313 | 1              | Imputed              | -                  | MACH                                                        | C            | 0.24 | 1         | 0.91                    | 1                | -     | -         | -                       | -                |
| HPFS-control    | rs17782313 | -              | Genotyped            | -                  | Affymetrix or Illumina chips                                | C            | 0.24 | 1         | 0.56                    | 1                | -     | -         | -                       | -                |
| HPFS-case       | rs17782313 | -              | Genotyped            | -                  | Affymetrix or Illumina chips                                | C            | 0.24 | 1         | 0.78                    | 1                | -     | -         | -                       | -                |
| InCHIANTI       | rs17782313 | -              | Imputed              | 1                  | MACH1.0.                                                    | C            | 0.26 | NA        | NA                      | NA               | 0.30  | NA        | NA                      | NA               |
| INTER99         | rs17782313 | 1              | Genotyped            | -                  | Illumina Human Cardio-metabo Chip, GenCall                  | C            | 0.25 | 1         | 0.94                    | 1                |       |           |                         |                  |
| MDC             | rs17782313 | -              | Genotyped            | -                  | Sequenom MassARRAY platform or TaqMan SNP Genotyping Assays | C            | 0.23 | 1         | 0.44                    | NA               | 0.23  | 1         | 0.12                    | NA               |

|                 |            |   |           |      |                                                         |   |      |      |      |    |      |      |      |    |
|-----------------|------------|---|-----------|------|---------------------------------------------------------|---|------|------|------|----|------|------|------|----|
| MESA_W          | rs17782313 | - | Genotyped | -    | Affymetrix 6.0 chip                                     | C | 0.24 | 1    | 0.29 | NA | 0.22 | 1    | 0.32 | NA |
| MESA_AA         | rs17782313 | - | Genotyped | -    | Affymetrix 6.0 chip                                     | C | 0.28 | 1    | 0.69 | NA | 0.29 | 1    | 0.20 | NA |
| MRC Ely         | rs17782313 | - | Genotyped | -    | Metabochip                                              | C | 0.23 | 1    | 0.60 | 1  | 0.27 | 1    | 0.60 | 1  |
| NHAPC           | rs17782313 | - | Genotyped | -    | TaqMan® 7900HT SNP Genotyping System (ABI PRISM 7900HT) | T | 0.23 | 0.99 | 0.95 | -  | 0.23 | 0.98 | 0.74 | -  |
| NHS-control     | rs17782313 | - | Genotyped | -    | Affymetrix or Illumina chips                            | C | -    | -    | -    | -  | 0.24 | 1    | 0.65 | 1  |
| NHS-case        | rs17782313 | - | Genotyped | -    | Affymetrix or Illumina chips                            | C | -    | -    | -    | -  | 0.24 | 1    | 0.43 | 1  |
| QFS             | rs17782313 | - | Imputed   | 1    | MACH                                                    | C | 0.28 | NA   | 0.78 | NA | 0.28 | NA   | 0.78 | NA |
| ROTTERDAM       | rs17782313 | - | Imputed   | 1    | MACH                                                    | C | 0.25 | NA   | 0.63 | NA | 0.25 | NA   | 0.98 | NA |
| SP2             | rs17782313 | - | Imputed   | 1    | IMPUTE v0.5                                             | C | NA   | NA   | NA   | NA | NA   | NA   | NA   | NA |
| SWHS            | rs17782313 | - | Genotyped | -    | Affymetrix 6.0 chip                                     | C | -    | -    | -    | -  | 0.21 | 1    | 0.16 | NA |
| WGHS            | rs17782313 | - | Imputed   | 0.96 | MACH 1.0.15                                             | C | -    | -    | -    | -  | 0.24 | 0.98 | 0.10 | NA |
| YangPyeong      | rs17782313 | - | Genotyped | -    | TaqMan SNP Genotyping Assays                            | C | 0.24 | 1    | 0.47 | NA | 0.25 | 1    | 0.15 | NA |
| YFS             | rs17782313 | 1 | Imputed   | 1    | MACH 1.0                                                | C | 0.17 | NA   | NA   | NA | 0.17 | NA   | NA   | NA |
| THISEAS_control | rs17782313 | - | Genotyped | -    | Metabochip                                              | G | 0.23 | 1    | 0.62 | NA | 0.23 | 1    | 1    | NA |
| THISEAS_case    | rs17782313 | - | Genotyped | -    | Metabochip                                              | G | 0.27 | 1    | 0.71 | NA | 0.28 | 1    | 1    | NA |

$r^2$ : correlation coefficient with rs9939609; MAF: minor allele frequency;  $P_{HWE}$ :  $P$ -values for Hardy–Weinberg equilibrium.

\*These studies provided data in men and women combined.

## References

1. Jess T, Zimmermann E, Kring SII, et al. Impact on weight dynamics and general growth of the common fts9939609: A longitudinal danish cohort study. *Int J Obes*. 2008;32(9):1388-1394.
2. The Aric I. The atherosclerosis risk in communit (aric) stui)y: Design and objectwes. *American Journal of Epidemiology*. 1989;129(4):687-702.
3. Fried LP, Borhani NO, Enright P, et al. The cardiovascular health study: Design and rationale. *Ann Epidemiol*. 1991;1(3):263-276.
4. Adair LS, Popkin BM, Akin JS, et al. Cohort profile: The cebu longitudinal health and nutrition survey. *International Journal of Epidemiology*. 40(3):619-625.
5. Firmann M, Mayor V, Vidal P, et al. The colaus study: A population-based study to investigate the epidemiology and genetic determinants of cardiovascular risk factors and metabolic syndrome. *BMC Cardiovascular Disorders*. 2008;8(1):6.
6. Konttinen H, MÄnnistÄ S, Sarlio-LÄhteenkorva S, Silventoinen K, Haukkala A. Emotional eating, depressive symptoms and self-reported food consumption. A population-based study. *Appetite*. 54(3):473-479.
7. Beulens JWJ, Monninkhof EM, Verschuren WMM, et al. Cohort profile: The epic-nl study. *International Journal of Epidemiology*. 39(5):1170-1178.
8. Day N, Oakes S, Luben R, et al. Epic-norfolk: Study design and characteristics of the cohort. European prospective investigation of cancer. *Br J Cancer*. 1999;80 Suppl 1:95-103.
9. Higgins M, Province M, Heiss G, et al. Nhlbi family heart study: Objectives and design. *American Journal of Epidemiology*. 1996;143(12):1219-1228.
10. Tuomilehto J, LindstrÄm J, Eriksson JG, et al. Prevention of type 2 diabetes mellitus by changes in lifestyle among subjects with impaired glucose tolerance. *New England Journal of Medicine*. 2001;344(18):1343-1350.
11. De Lucia Rolfe E, Loos RJF, Druet CI, et al. Association between birth weight and visceral fat in adults. *The American Journal of Clinical Nutrition*. 92(2):347-352.
12. Feinleib M, Kannel WB, Garrison RJ, McNamara PM, Castelli WP. The framingham offspring study. Design and preliminary data. *Prev Med*. 1975;4(4):518-525.
13. Benyamin B, SÄrensen TIA, Schousboe K, Fenger M, Visscher PM, Kyvik KO. Are there common genetic and environmental factors behind the endophenotypes associated with the metabolic syndrome? *Diabetologia*. 2007;50(9):1880-1888.
14. Jaddoe VW, van Duijn CM, van der Heijden AJ, et al. The generation r study: Design and cohort update 2010. *Eur J Epidemiol*. 25(11):823-841.
15. Renstrom F, Shungin D, Johansson I, et al. Genetic predisposition to long-term nondiabetic deteriorations in glucose homeostasis: Ten-year follow-up of the glacier study. *Diabetes*. 60(1):345-354.
16. Harris TB, Visser M, Everhart J, et al. Waist circumference and sagittal diameter reflect total body fat better than visceral fat in older men and women: The health, aging and body composition study. *Annals of the New York Academy of Sciences*. 2000;904(1):462-473.
17. Barker DJP, Osmond C, ForsÄn TJ, Kajantie E, Eriksson JG. Trajectories of growth among children who have coronary events as adults. *New England Journal of Medicine*. 2005;353(17):1802-1809.
18. Syddall HE, Aihie Sayer A, Dennison EM, et al. Cohort profile: The hertfordshire cohort study. *International Journal of Epidemiology*. 2005;34(6):1234-1242.
19. Qi Q, Yu Z, Ye X, et al. Elevated retinol-binding protein 4 levels are associated with metabolic syndrome in chinese people. *J Clin Endocrinol Metab*. 2007;92(12):4827-4834.
20. Bouchard C, Sarzynski MA, Rice TK, et al. Genomic predictors of the maximal o2 uptake response to standardized exercise training programs. *Journal of Applied Physiology*. 110(5):1160-1170.
21. Rimm EB, Giovannucci EL, Willett WC, et al. Prospective study of alcohol consumption and risk of coronary disease in men. *Lancet*. 1991;338(8765):464-468.
22. Ferrucci L, Bandinelli S, Benvenuti E, et al. Subsystems contributing to the decline in ability to walk: Bridging the gap between epidemiology and geriatric practice in the inchianti study. *J Am Geriatr Soc*. 2000;48(12):1618-1625.
23. GlÄmer C, JÄrgensen T, Borch-Johnsen K. Prevalences of diabetes and impaired glucose regulation in a danish population: The inter99 study. *Diabetes Care*. 2003;26(8):2335-2340.

24. Manjer J, Elmstahl SI, Janzon L, Berglund Gr. Invitation to a population-based cohort study: Differences between subjects recruited using various strategies. *Scandinavian Journal of Public Health*. 2002;30(2):103-112.
25. Bild DE, Bluemke DA, Burke GL, et al. Multi-ethnic study of atherosclerosis: Objectives and design. *American Journal of Epidemiology*. 2002;156(9):871-881.
26. Forouhi NG, Luan J, Hennings S, Wareham NJ. Incidence of type 2 diabetes in england and its association with baseline impaired fasting glucose: The ely study 1990–2000. *Diabetic Medicine*. 2007;24(2):200-207.
27. Ye X, Yu Z, Li H, Franco OH, Liu Y, Lin X. Distributions of c-reactive protein and its association with metabolic syndrome in middle-aged and older chinese people. *Journal of the American College of Cardiology*. 2007;49(17):1798-1805.
28. Colditz GA, Manson JE, Hankinson SE. The nurses' health study: 20-year contribution to the understanding of health among women. *J Womens Health*. 1997;6(1):49-62.
29. Qi Q, Wu Y, Li H, et al. Association of gckr rs780094, alone or in combination with gck rs1799884, with type 2 diabetes and related traits in a han chinese population. *Diabetologia*. 2009;52(5):834-843.
30. Hofman A, van Duijn C, Franco O, et al. The rotterdam study: 2012 objectives and design update. *European Journal of Epidemiology*. 26(8):657-686.
31. Hughes K, Yeo PP, Lun KC, et al. Cardiovascular diseases in chinese, malays, and indians in singapore. li. Differences in risk factor levels. *J Epidemiol Community Health*. 1990;44(1):29-35.
32. Zheng W, Long J, Gao Y-T, et al. Genome-wide association study identifies a new breast cancer susceptibility locus at 6q25.1. *Nat Genet*. 2009;41(3):324-328.
33. Wen W, Cai Q, Xiang Y-B, et al. The modifying effect of c-reactive protein gene polymorphisms on the association between central obesity and endometrial cancer risk. *Cancer*. 2008;112(11):2409-2416.
34. Shu XO, Long J, Cai Q, et al. Identification of new genetic risk variants for type 2 diabetes. *PLoS Genet*. 6(9).
35. Zheng W, Chow W-H, Yang G, et al. The shanghai women's health study: Rationale, study design, and baseline characteristics. *American Journal of Epidemiology*. 2005;162(11):1123-1131.
36. Karasawa S, Daimon M, Sasaki S, et al. Association of the common fat mass and obesity associated (fto) gene polymorphism with obesity in a japanese population. *Endocr J*. 57(4):293-301.
37. Theodoraki E, Nikopousios T, Suhorutsenko J, et al. Fibrinogen beta variants confer protection against coronary artery disease in a greek case-control study. *BMC Medical Genetics*. 11(1):28.
38. Ridker PM, Chasman DI, Zee RYL, et al. Rationale, design, and methodology of the women's genome health study: A genome-wide association study of more than 25 000 initially healthy american women. *Clinical Chemistry*. 2008;54(2):249-255.
39. Li H, Kilpeläinen T, Liu C, et al. Association of genetic variation in <i>fto</i> with risk of obesity and type 2 diabetes with data from 96,551 east and south asians. *Diabetologia*. 55(4):981-995.
40. Raitakari OT, Juonala M, Rönkä T, et al. Cohort profile: The cardiovascular risk in young finns study. *International Journal of Epidemiology*. 2008;37(6):1220-1226.
41. Nielsen BM, Nielsen MM, Jakobsen MU, et al. A cross-sectional study on trans-fatty acids and risk markers of chd among middle-aged men representing a broad range of bmi. *British Journal of Nutrition*. 106(08):1245-1252.
42. Willett WC, Sampson L, Stampfer MJ, et al. Reproducibility and validity of a semiquantitative food frequency questionnaire. *American Journal of Epidemiology*. 1985;122(1):51-65.
43. Kumanyika SK, Tell GS, Shemanski L, Martel J, Chinchilli VM. Dietary assessment using a picture-sort approach. *Am J Clin Nutr*. 1997;65(4 Suppl):1123S-1129S.
44. Djouss L, Folsom AR, Province MA, Hunt SC, Ellison RC. Dietary linolenic acid and carotid atherosclerosis: The national heart, lung, and blood institute family heart study. *The American Journal of Clinical Nutrition*. 2003;77(4):819-825.
45. Klipstein-Grobusch K, den Breeijen JH, Goldbohm RA, et al. Dietary assessment in the elderly: Validation of a semiquantitative food frequency questionnaire. *Eur J Clin Nutr*. 1998;52(8):588-596.
46. Johansson I, Hallmans Gr, Wikman Ås, Biessy C, Riboli E, Kaaks R. Validation and calibration of food-frequency questionnaire measurements in the northern sweden health and disease cohort. *Public Health Nutrition*. 2002;5(03):487-496.

47. Jørgensen T, Borch-Johnsen K, Thomsen TF, Ibsen H, Glümer C, Pisinger C. A randomized non-pharmacological intervention study for prevention of ischaemic heart disease: Baseline results inter99 (1). *European Journal of Cardiovascular Prevention & Rehabilitation*. 2003;10(5):377-386.
48. Shu XO, Yang G, Jin F, et al. Validity and reproducibility of the food frequency questionnaire used in the shanghai women's health study. *Eur J Clin Nutr*.58(1):17-23.
49. Sasaki S, Yanagibori R, Amano K. Validity of a self-administered diet history questionnaire for assessment of sodium and potassium: Comparison with single 24-hour urinary excretion. *Jpn Circ J*. 1998;62(6):431-435.
